# Supplementary material
Source: Research Square preprint supplement (doi:10.21203/rs.3.rs-9503349/v1)
Supplement: Supplementary file 1 [file 1e3bc26b3037bbb2f7ad3e1c.xlsx]

## Sheet: Supplementary Table 1
orig.ident	Gender	TreatmentStage_ofProcessedSample	Stage_atDiagnosis	Mets_atDiagnosis	Age_atDiagnosisY	RiskCategory	Time_sinceDiagnosis	PrimaryTreatment	LocalProgressionPrimary	LocalProgressionTreatment	DevelopmentOfMetastasis	Time_Primary-Met.Y	MetastasisSite	MetastasisTreatment	Time_sinceMetastasisDiagnosisY	PatientStatus	LocationPrimaryTumor	primary_mutation	secondary_mutation	origin	Patient_nr	organ	Chr 3	Chr 8	location	sequencing_determinig_mutations	Matched_healthy	No_Libraries_sequenced
mUM01	M	no treatment	T2b	No	59	NA	9.51233	Protontherapy	NA	NA	Yes	NA	Liver	pip_nivo	0.128767	Deceased	choroid	GNAQ	BAP1	metastasis	P23	liver	loss	gain	liver	Mel array		1
mUM02	M	no treatment	T3a	No	59	NA	13.8027	Enucleation	NA	NA	Yes	NA	Brain	pip_nivo	1.6	Deceased	choroid	GNAQ	none	metastasis	P24	brain	loss	gain	brain	Mel array		1
mUM04	F	pip_nivo	unknown	NA	66	NA	12.8082	Radiotherapy	NA	NA	Yes	NA	subcutaneous	Tebenta, pip_nivo	1.20274	Deceased	unspecified	GNA11	BAP1	metastasis	P25	skin	loss	gain	subcut	Mel array		1
mUM05	F	Tebentafusp/Mekinist	T3b	No	58	NA	8.72055	Protontherapy	NA	NA	Yes	NA	subcutaneous	pembro_other, temodal, pip_nivo, tebentafusp, tebentafusp_mekinist	0.832877	Deceased	ciliary body	GNA11	BAP1	metastasis	P26	skin	loss	gain	subcut	Mel array		1
mUM06	M	Tebentafusp	T3b	No	67	NA	3.23836	Enucleation	NA	NA	Yes	NA	subcutaneous	tebenta	0.545205	Alive	choroid	GNA11	BAP1	metastasis	P27	skin	loss	gain	subcut	Mel array		1
mUM07	F	pip_nivo	unknown	NA	52	NA	10.8082	Protontherapy	NA	NA	Yes	NA	Thyroid	pip_nivo, nivolumab_visugromab, olaparib	0.561644	Deceased	unspecified	GNAQ	BAP1	metastasis	P28	thyroid	loss	gain	thyroid	NA		1
mUM08	F	no treatment	T2a	No	49	NA	15.8384	Radiotherapy	NA	NA	Yes	NA	Brain	pip_nivo	2.90685	Alive	choroid	GNAQ	BAP1	metastasis	P29	brain	loss	gain	brain	Mel array		2
mUM09	F	no treatment	T2b	No	71	NA	10.7397	Protontherapy	NA	NA	Yes	NA	subcutaneous	pip_nivo, temodal, xalkori, carboplatinib, cobimentinib_regorafenib	0.394521	Deceased	choroid	GNAQ	BAP1	metastasis	P30	skin	loss	gain	subcut	FoundationOne		1
mUM11	M	CDYP688A12101 (NCT05415072)	T3b	No	48	NA	4.34247	TantalumClip-Insertion	NA	NA	Yes	NA	subcutaneous	pip_nivo, temodal, carbo_pacil, DYP688	0.375342	Deceased	ciliary body	GNAQ	BAP1	metastasis	P31	skin	loss	disomy	subcut	Mel array		1
mUM13	F	Tebentafusp	T3b	No	58	NA	8.72055	Protontherapy	NA	NA	Yes	NA	Liver	pembro_other, temodal, pip_nivo, tebentafusp, tebentafusp_mekinist	2.40548	Deceased	ciliary body	GNA11	BAP1	metastasis	P26	liver	loss	gain	liver	Mel array		2
mUM14	M	no treatment	T4	Yes	52	NA	9.80822	Protontherapy	NA	NA	Yes	NA	Liver	tebenta, temodal	1.10137	Deceased	unspecified	GNA11	BAP1	metastasis	P32	liver	loss	gain	liver	Mel array		1
mUM16	F	no treatment	unknown	NA	76	NA	4.67945	Protontherapy	NA	NA	Yes	NA	Liver	tebenta	4.00548	Alive	choroid	GNAQ	none	metastasis	P34	liver	loss	disomy	liver	Mel array		1
mUM18	M	no treatment	unknown	NA	63	NA	5.60274	Protontherapy	NA	NA	Yes	NA	Liver	pip_nivo	3.3726	Alive	unspecified	GNAQ	BAP1	metastasis	P35	liver	loss	gain	liver	Mel array		1
mUM19	M	pip_nivo	T3b	No	48	NA	4.34247	TantalumClip-Insertion	NA	NA	Yes	NA	Liver	pip_nivo, temodal, carbo_pacil, DYP688	0.8	Deceased	ciliary body	GNAQ	BAP1	metastasis	P31	liver	loss	gain	liver	Mel array		1
mUM20	M	no treatment	unknown	NA	58	NA	5.83836	TantalumClip-Insertion	NA	NA	Yes	NA	Liver	pip_nivo, temodal	1.27671	Deceased	ciliary body	GNA11	BAP1	metastasis	P36	liver	loss	gain	liver	Mel array		1
pUM01	NA	NA	NA	NA	NA	NA	NA	NA	NA	NA	NA	NA	NA	NA	NA	NA	choroid	unknown	unknown	primary	P1	eye	unknown	unknown	choroid	not sequenced		1
pUM02	M	T1: Plaque T2: Recurrence Enucleation	T3	No	68.9014	1	4.30685	PlaqueBracytherapy	Yes	Enucleation	No	-	-	-	-	Alive	choroid	GNAQ	EIF1AX	primary	P2	eye	disomy	disomy	choroid	WES		1
pUM03	M	Radiotherapy	T3	No	70.7096	1 (block seq pending)	5.73973	Radiotherapy	No	-	No	-	-	-	-	Alive	choroid	unknown	unknown	primary	P3	eye	disomy	disomy	choroid	not sequenced		1
pUM04	M	Enucleation	T3	No	56.2	1 (Path), 2 (Seq)	5.14795	Enucleation	No	-	No	-	-	-	-	Alive	choroid	GNAQ	none	primary	P4	eye	disomy	gain	choroid	WES		1
pUM05	M	Enucleation	T4	No	42.0438	3 (Path)/ 1/2 (Seq)	5.03288	Enucleation	No	-	No	-	-	-	-	Alive	ciliary body	GNA11	SF3B1	primary	P5	eye	disomy	disomy	ciliary body	WES		1
pUM06	F	Enucleation	T4	No	32.8877	2	4.99726	Enucleation	No	-	No	-	-	-	-	Alive	chiliochoroidal	GNA11	SF3B1	primary	P6	eye	disomy	gain	ciliochoroidal	WES		1
pUM09	M	Enucleation	T3	No	65.8767	4	3.88493	Enucleation	No	-	No	-	-	-	-	Alive	choroid	PLCB4	BAP1	primary	P7	eye	loss	gain	choroid	WES		2
pUM10	M	Recurrence Enucleation	T2	No	27.0301	1/2	12.5425	PlaqueBracytherapy	Yes	Enucleation	Yes	6.65205	Liver	SIRT	5.89041	Alive	choroid	GNAQ	SF3B1	primary	P8	eye	disomy	disomy	choroid	WES		1
pUM11	M	Recurrence Enucleation	T2	No	78.7863	4	8.17808	PlaqueBracytherapy	Yes	Enucleation	Yes	4.55616	-	-	0.0575342	Deceased	ciliary body	GNA11	BAP1	primary	P9	eye	loss	gain	ciliary body	WES		2
pUM12	F	Plaque	T1	No	69.9507	4 (block seq pending)	4.2274	PlaqueBracytherapy	No	-	No	-	-	-	-	Alive	ciliary body	unknown	unknown	primary	P10	eye	loss	gain	ciliary body	not sequenced		2
pUM14	F	Enucleation	T1b	No	62.9726	4	4.95616	Enucleation	No	-	No	-	-	-	-	Alive	iris	unknown	unknown	primary	P11	eye	loss	gain	iris	not sequenced		1
pUM15	F	Plaque	T1a	No	60.2877	1 (block seq pending)	8.84932	PlaqueBracytherapy	No	-	No	-	-	-	-	Alive	iris	unknown	unknown	primary	P12	eye	disomy	disomy	iris	not sequenced		2
pUM16	M	Enucleation	T2	No	68.1616	1	4.73151	Enucleation	No	-	No	-	-	-	-	Alive	choroid	GNAQ	EIF1AX	primary	P13	eye	disomy	disomy	choroid	WES		1
pUM17	F	Iridocyclectomy	T2a	No	51.4877	1 (block seq pending)	27.8192	-	Yes	Iridocyclectomy	No	-	-	-	-	Alive	iris	unknown	unknown	primary	P14	eye	disomy	disomy	iris	not sequenced		2
pUM19	M	Enucleation	T1c	No	59.5726	3/4	2.65479	Enucleation	No	-	No	-	-	-	-	Alive	iris	GNAQ	BAP1	primary	P16	eye	loss	disomy	iris	WES	hIr19	1
pUM20	M	Recurrence Enucleation	T1	No	59.3918	2	8.38082	PDT	Yes	Plaque Bracytherapy, Enucleation	Yes	6.71781	-	-	1.66301	Alive	choroid	GNA11	SF3B1	primary	P17	eye	disomy	gain	choroid	WES	hCh20	1
pUM21	M	Enucleation	T1	No	65.5781	2	4.5726	Enucleation	No	-	No	-	-	-	-	Alive	iris	GNAQ	SF3B1	primary	P18	eye	disomy	gain	choroid	WES	hCh21	1
pUM22	M	Recurrence Enucleation	T1	No	71.937	1/2 (Path), 2 (Seq)	4.86027	PDT	Yes	Enucleation	No	-	-	-	-	Alive	choroid	GNA11	SF3B1	primary	P19	eye	disomy	gain	choroid	WES	hCh22	1
pUM23	M	Enucleation	T3	No	77.2329	3 (nothing detected in WES)	1.52329	Enucleation	No	-	No	-	-	-	-	Alive	choroid	GNA11	EIF1AX	primary	P20	eye	disomy	disomy	choroid	WES	hCh23	1
pUM24	M	Enucleation	T3	No	56.5918	2	2.8411	Enucleation	No	-	No	-	-	-	-	Alive	choroid	GNA11	EIF1AX	primary	P21	eye	disomy	gain	choroid	WES	hCh24	1
pUM25	M	Enucleation	T4	No	83.8247	2	4.53425	Enucleation	No	-	Yes	3.31233	Subcutaneous		0.630137	Deceased	choroid	GNAQ	SF3B1	primary	P22	eye	disomy	gain	choroid	WES	hCh25	1
hCh28	M															Alive	choroid			healthy	P15	eye			choroid	not sequenced		1

## Sheet: Supplementary Table 2
Gene	Correlation with CytoTRACE2 score
HSPD1	0.338897
PABPC1	0.335891
RPLP0	0.335083
HNRNPA1	0.333304
RPS19	0.329722
RPL22	0.328812
RPL36A	0.321994
NPM1	0.32122
HSP90AB1	0.3202
MYC	0.319616
NAP1L1	0.318709
RPLP2	0.318219
DNAJA1	0.315772
RPS16	0.314864
RPL11	0.312798
RPL4	0.312501
RPL39	0.312478
RPS21	0.309989
YBX1	0.309507
RPL27A	0.309434
ID2	0.30917
TAF1D	0.308965
RPL6	0.307146
HSPE1	0.305373
RPL23	0.304715
EIF5	0.302037
HSPH1	0.299967
RPL18	0.299528
RPL22L1	0.298728
JUN	0.298624
EEF1G	0.297543
UQCRH	0.297274
H3-3A	0.297014
UBC	0.296495
SRSF3	0.294747
RPL31	0.29367
RPS2	0.292485
JUND	0.291687
RPL7	0.29142
CCT2	0.291391
RPL18A	0.289971
EIF3E	0.289678
EEF1D	0.289332
FOS	0.289315
RPL38	0.288968
HSPA8	0.288377
RPL5	0.288267
YBX3	0.287633
RPL37	0.2852
RAN	0.285026
DUSP6	0.284879
RPS25	0.284504
RPS17	0.284106
HSPA1A	0.283032
EEF1B2	0.282824
DNAJB1	0.28154
RPL3	0.281367
DDX5	0.28121
SLC25A5	0.279912
RPS15A	0.279111
UBE2S	0.278715
ATF4	0.278682
RSL24D1	0.278605
RPS3	0.278195
RPL28	0.278109
MARCKSL1	0.278048
RPS8	0.277594
MLF1	0.277107
BTF3	0.276933
SLC25A3	0.275841
RPS11	0.275835
RACK1	0.275761
PPP1R15A	0.275754
RPL13A	0.275436
BTG1	0.27516
TPT1	0.274298
HSPA1B	0.274005
RPS20	0.273701
RPS29	0.273562
EEF2	0.27333
RPL29	0.272654
RPL9	0.272567
RPS13	0.271884
RPSA	0.271802
RPS23	0.2716
H3-3B	0.271581
RPL10A	0.271493
MAP1LC3B	0.271072
CALM2	0.270502
C12orf57	0.270245
CYCS	0.270196
RPL12	0.269469
SAP18	0.269131
NOP58	0.268979
SOX4	0.268363
PHB2	0.268247
ID1	0.267741
UBA52	0.26752
BRD2	0.266948
EIF3L	0.266314
RPS28	0.266037
RPL36	0.265754
CALM1	0.265701
RPL24	0.265427
HSP90AA1	0.265222
RPL8	0.26499
ST13	0.264711
RPL41	0.264656
EIF4A1	0.264631
RPS7	0.264085
PLK2	0.263676
FAU	0.263518
TXN	0.263425
RPL14	0.262803
RSRC2	0.261948
NCL	0.261946
FTL	0.261883
BZW2	0.261042
HNRNPDL	0.260059
CKS2	0.259919
NSA2	0.259712
RPS6	0.259598
SERTAD1	0.2587
RPL10	0.258625
RPS18	0.258298
TSPO	0.257253
CCNB1IP1	0.257057
NOP53	0.25641
FOSB	0.256337
RPLP1	0.256062
RPS9	0.256035
UBB	0.255851
RPS27	0.255814
SNU13	0.255544
RPS5	0.255536
HNRNPA2B1	0.255472
ADAMTS1	0.255406
JUNB	0.255181
RBM3	0.255038
RPL13	0.254433
RPL37A	0.254
IER2	0.253288
HSPA5	0.253088
RPL17	0.253018
SFPQ	0.253014
SLC38A2	0.25293
SERBP1	0.252805
RPL7A	0.252753
PTMA	0.252163
SLC25A33	0.252047
RPS24	0.251999
EIF3D	0.250662
HNRNPAB	0.249785
SLC2A3	0.249223
CFL1	0.24905
ATP5MC2	0.248741
RPL34	0.248691
ID3	0.24851
ZFP36L1	0.248505
RPS3A	0.248359
NR4A1	0.248015
MCL1	0.247991
JPT1	0.247793
RPS15	0.246715
CRY1	0.246714
NACA	0.246598
BAG3	0.246359
RHOB	0.24633
PPIB	0.246132
ATP5MG	0.246104
RCC1	0.246092
RPL36AL	0.246089
RPL15	0.246049
RPL32	0.245807
MORF4L2	0.24572
CBX3	0.245666
RPS27A	0.244835
ATP5F1C	0.244689
SRSF7	0.244503
EIF4G2	0.244399
CDC42EP3	0.243775
ARF4	0.243554
YWHAQ	0.243481
CCT3	0.243323
SRSF2	0.242892
XBP1	0.242717
EIF3F	0.242648
TUBB4B	0.24245
RPL27	0.242377
KLF6	0.24236
EIF3I	0.242159
STRAP	0.242018
RSL1D1	0.241565
SRM	0.241489
HMGN1	0.241293
EIF5A	0.241208
NFATC2	0.240717
PFDN5	0.240204
RPL35	0.240153
CCT4	0.24004
AHCY	0.239981
KLF4	0.239856
TUBB2A	0.239697
RPL35A	0.239671
APEX1	0.239578
SEC11A	0.239535
HNRNPA0	0.239471
CCNI	0.239102
EIF3H	0.238778
EIF3K	0.238629
TPI1	0.238328
HOOK1	0.237489
HNRNPC	0.237107
TRA2B	0.236985
OSER1	0.236942
UQCRB	0.236351
STMN1	0.235482
RPL23A	0.23532
SEC61B	0.235079
TUBA1B	0.235066
RPL26	0.23485
SET	0.234695
COX7C	0.234554
FXYD5	0.233535
DUSP1	0.233525
SSR4	0.233523
HERPUD1	0.233007
ELOC	0.232936
PABPC4	0.232901
GYPC	0.232711
UFC1	0.232653
ANKRD30B	-0.232647
NME2	0.232633
SKP1	0.232556
GNG5	0.232075
ATP5MK	0.231623
RPL30	0.231557
RPS4X	0.231193
HSP90B1	0.231084
RPL21	0.23103
IMPDH2	0.230732
PA2G4	0.230647
NDUFS5	0.230455
FBL	0.230204
TMA7	0.230145
CCT6A	0.230001
KHDRBS1	0.229683
EGR1	0.229636
EIF3M	0.229311
YWHAZ	0.229274
TMSB10	0.228932
MZT2B	0.228698
SLC16A1	0.228601
RPS12	0.228269
EIF4A2	0.228088
CFAP20	0.228058
NRN1	0.227962
TUBA1A	0.227618
EIF1	0.227585
MAFF	0.227466
LDHB	0.227444
PARK7	0.227155
SPTSSA	0.22709
RBBP6	0.22695
ARG2	0.226879
RAC1	0.226216
NAMPT	0.225778
DUSP4	0.225569
DYNLL1	0.22546
ENY2	0.225407
TRMT112	0.225247
COX5A	0.225059
EIF3A	0.224987
EIF4A3	0.224897
NR4A2	0.224839
ATF3	0.224624
GAPDH	0.224333
CCDC85B	0.224094
NOP56	0.224021
SDCBP	0.223684
TRIR	0.223336
ZFP36	0.223259
CCNG1	0.223079
CHP1	0.22307
CIRBP	0.222718
PITHD1	0.222707
OST4	0.222704
TOMM7	0.22246
SNRPB	0.222232
TGIF1	0.222061
MORF4L1	0.222061
PTMS	0.22195
LDHA	0.221815
ATP6V1G1	0.221795
UBL5	0.221791
PTGES3	0.221312
UXT	0.221233
HMGB1	0.220455
SPRY2	0.220182
ZFP36L2	0.219708
TOMM20	0.219655
TOP1	0.21951
CHCHD2	0.2192
ASXL1	0.219138
BANF1	0.219106
ATP5F1E	0.218759
SUB1	0.218533
RPS27L	0.218476
DDX21	0.217954
SAT1	0.217796
SRP14	0.217641
SERP1	0.217599
PCBP1	0.217588
ENO1	0.217265
SNRPF	0.217161
MAPRE2	0.21708
GADD45A	0.216985
RPS14	0.216599
VDAC2	0.216386
SIGIRR	0.216384
FUS	0.215769
ARL4A	0.215601
COX7B	0.215431
EEF1A1	0.215418
SEM1	0.215243
BTG3	0.21519
NASP	0.215176
CALR	0.215108
PSMA3	0.215015
HNRNPL	0.214799
MYADM	0.21464
SLC25A6	0.214479
LGMN	0.214477
MRPS21	0.214257
RPS10	0.214026
SARAF	0.213786
TPM3	0.213517
CLTA	0.213311
COMMD6	0.213289
MYLIP	0.213095
DDT	0.21304
EIF3G	0.213001
KPNA2	0.212752
EIF4B	0.212537
ARIH1	0.212368
FKBP1A	0.212167
ETNK1	0.211757
SRSF10	0.211495
TMEM258	0.211318
EIF1AX	0.211284
PNRC2	0.21112
YTHDF2	0.21088
SUMO2	0.210876
TUBB	0.21087
POLR1D	0.210092
MIF	0.209982
RTRAF	0.209914
TOB1	0.209714
HSBP1L1	0.209589
NUFIP2	0.209417
P4HB	0.209223
RRP12	0.209177
H2AX	0.208937
PPIA	0.208927
PPP1R10	0.208543
ATP5F1D	0.208502
SYF2	0.208461
RBIS	0.208138
SF3B6	0.208117
PDIA3	0.20808
COX4I1	0.208058
TIMM13	0.208048
HES1	0.206958
CCNL1	0.206936
NDUFAF8	0.20672
PELI1	0.206676
ENSG00000280325	0.206664
ERBB4	-0.206536
HMGCS1	0.206449
HSPA9	0.206375
ERP29	0.206321
TMEM263	0.206096
DPM1	0.20605
TOB2	0.20604
HNRNPU	0.206031
DBI	0.205889
RABGGTB	0.205866
HSPB1	0.205854
TRIM28	0.205614
ATP5MJ	0.205553
IER5	0.205296
CST3	0.20515
BUD31	0.204948
TUBA1C	0.204708
SNRPG	0.204491
POLR2L	0.204384
DUSP5	0.204345
PMAIP1	0.204325
PQBP1	0.204029
CFAP61	-0.20394
SOD1	0.203873
HINT1	0.203829
COX5B	0.203794
CD81	0.203775
OXA1L	0.203581
PTRHD1	0.203491
HNRNPF	0.203485
RBM8A	0.203405
PGLS	0.202884
ATP5PF	0.202814
LSM7	0.202778
CHORDC1	0.202721
GTF2B	0.202554
SSU72	0.202497
COX6B1	0.202491
NOLC1	0.202393
ATP5MF	0.202197
U2AF1	0.201974
RBM39	0.201927
YWHAG	0.201823
EBPL	0.201714
UQCR10	0.201711
PPP1CC	0.201668
SGK1	0.201477
ATP5IF1	0.20133
CNIH1	0.201308
SNRPD2	0.201174
AHSA1	0.201159
CBX4	0.200932
ATP5PO	0.20073
UBXN1	0.20044
UBL3	0.200286
TBC1D16	0.200246
RPL19	0.199987
RANBP1	0.199949
PNRC1	0.199905
NPC2	0.199766
KIF9	0.19975
ZNF593	0.199748
RBMX	0.199688
BBLN	0.199655
NONO	0.199374
DDIT4	0.198985
SELENOW	0.198799
PPP1R14B	0.198745
AZIN1	0.198526
PTP4A2	0.198421
EIF2S2	0.198254
EIF1B	0.198083
HNRNPK	0.197969
CALU	0.197889
AMD1	0.197625
OAT	0.197396
CNPY2	0.197365
C11orf96	0.197171
SSR2	0.197138
PPFIBP1	0.196964
NFKBIA	0.196756
SNRPE	0.196746
NHP2	0.196696
GADD45B	0.196596
SBDS	0.196241
APRT	0.196178
CYP51A1	0.196174
HSBP1	0.196013
IER3	0.195789
YWHAB	0.195736
CLIC4	0.195565
TMEM50A	0.195183
TCP1	0.195096
COX6C	0.195044
PCBP2	0.195021
TMEM14C	0.194508
FABP5	0.194503
CDC37	0.194103
FOSL1	0.19385
OSTC	0.193753
CCT8	0.193666
UBE2D3	0.193615
SSB	0.193418
ATP5MC1	0.193277
ANP32B	0.193076
ING1	0.19302
RABAC1	0.19298
NDUFB11	0.192833
DNAJB9	0.192819
AKIRIN1	0.192616
CHMP1B	0.192561
ELOVL5	0.192119
ILF2	0.191924
ID4	0.191643
BSG	0.191488
AP2S1	0.191431
SMIM26	0.191266
NTNG1	-0.191024
COPS8	0.190961
ZNF706	0.19095
SLIRP	0.190839
RAB11A	0.190646
LAMTOR5	0.190644
NDUFA1	0.190338
RWDD1	0.190323
CAMTA1	0.190307
EDF1	0.190296
HIGD2A	0.190194
BAZ1A	0.190122
CCN1	0.190113
SINHCAF	0.190065
DNAAF2	0.190006
COX6A1	0.189855
PTTG1	0.189791
ARL6IP4	0.189757
SULT1C2	-0.189475
FSCN1	0.18947
GDI2	0.189375
MMP17	0.189345
YME1L1	0.189312
MLEC	0.189216
TMED10	0.189202
TUBB6	0.188928
RPS6KA5	0.188916
CUTA	0.188829
ACTB	0.188807
UBALD2	0.188731
MTHFD2	0.188688
SRSF5	0.18854
ZC3H15	0.188412
NDUFA6	0.18837
SRRM1	0.188353
KRT10	0.188338
CDH1	-0.188322
PPP2CA	0.188271
ZBTB10	0.188127
H2AW	0.188022
MAGOH	0.187959
CPED1	-0.1879
TUFM	0.187759
MYL12A	0.187718
EIF3J	0.187654
RBX1	0.187609
IGBP1	0.187426
LSM4	0.186945
UQCRQ	0.186792
MT-RNR2	-0.186724
CCDC59	0.186617
ERH	0.186579
SRSF9	0.186495
PNP	0.186292
PSMB7	0.186252
CLK1	0.186179
DNAJB6	0.185907
RDX	0.185695
NENF	0.185682
PPA1	0.185368
FAM53C	0.185183
SNX3	0.184867
AURKAIP1	0.184641
EIF2S3	0.184592
TRIB1	0.18457
NIFK	0.184297
ATP5F1B	0.184099
VCP	0.183973
DDOST	0.183954
H2AC6	0.183684
GNL3	0.183638
NUDT4	0.183575
ATF5	0.183332
SNRPD1	0.183175
ETF1	0.183172
SRSF6	0.18306
H4C3	0.183041
C19orf53	0.182737
MAFB	0.182705
CD320	0.182635
UBE2B	0.182525
ARF6	0.182512
TCEAL9	0.182455
CEMIP2	0.182398
SLC3A2	0.182303
BAX	0.182274
PFDN2	0.182171
NIBAN1	-0.182129
SSBP4	0.18164
KLF2	0.181462
COQ10B	0.181462
OAZ1	0.181409
ATP5PD	0.181375
MLF2	0.180939
ATP5MC3	0.18091
FAAP20	0.180832
SNRPA	0.180826
LMNA	0.18067
TP53RK	0.180578
RSRP1	0.180435
ALKBH7	0.18039
H2AZ1	0.180389
PRMT1	0.18029
METAP2	0.180283
ARPC3	0.180252
RLF	0.180005
KIF18A	0.17999
TNFSF9	0.179981
VAPA	0.179759
NDUFA4	0.179728
CYSLTR2	0.179559
PFDN4	0.179558
TOMM22	0.17917
PSMG1	0.178968
TXNL4A	0.178965
SLC5A10	-0.178948
EWSR1	0.178923
PLAT	0.178894
ADSL	0.178869
XRCC6	0.178843
RALY	0.17876
WBP11	0.178551
MICOS10	0.178512
L3MBTL4	-0.178496
UBE2N	0.178442
PPDPF	0.178402
DDX3X	0.178221
ATP5PB	0.178173
TXN2	0.178108
INTS6	0.178096
ERGIC3	0.17767
RPSAP58	0.177613
PSMB4	0.177572
YWHAH	0.177546
MRPS36	0.177515
RNASEK	0.177405
SEC61G	0.177236
CTSC	0.17722
GRID2	-0.176925
C1QBP	0.176868
PGD	0.176763
POLR1F	0.17675
PRELID1	0.176669
CEBPB	0.176638
XRN2	0.176588
BTG2	0.176577
ZNF106	0.17645
PABPN1	0.17605
TRAPPC5	0.175862
ARL6IP1	0.175786
PDCD5	0.175774
EFNA1	0.175739
MAPRE1	0.175676
IPO7	0.175452
TBCA	0.175354
REX1BD	0.175163
ZNF24	0.175121
MZT2A	0.175108
MRPL52	0.175106
TIMM50	0.175071
ELOB	0.174972
MRPL51	0.174949
CSDE1	0.174932
NEDD8	0.174911
NXT1	0.174689
BCAS2	0.174685
SUPT4H1	0.17468
EIF3B	0.174672
PRDX6	0.174582
COX8A	0.174481
TMEM18	0.174357
DNAJC4	0.174334
COX7A2L	0.173902
SNRPB2	0.17388
POLR1H	0.173842
CYTL1	0.173687
MRPS33	0.173658
C4orf48	0.173607
SH3BGRL3	0.173488
TOMM5	0.173351
GLA	0.173259
BZW1	0.172987
KIF5B	0.172885
RPS19BP1	0.172783
MRPL57	0.172781
ZNHIT1	0.172686
ELF1	0.172662
COPS9	0.172604
CCT5	0.172546
FKBP10	0.172329
TMX4	0.172257
ETS2	0.172255
NOP10	0.172088
IKBIP	0.172059
CCDC47	0.172028
PHLDA1	0.171971
CSNK1A1	0.171879
DAD1	0.17164
MFAP2	0.171579
PRNP	0.171386
STIP1	0.17138
MPST	0.171133
AK2	0.171073
MRPL20	0.171063
UGCG	0.170884
ETV5	0.170753
PDE3B	-0.170721
LGALS3	0.170684
MAL	0.170615
RHEB	0.170598
TSC22D1	0.170575
PSMB5	0.170493
LAMTOR4	0.1704
SERPINH1	0.170364
ERCC1	0.170219
GNG12	0.170184
RUVBL2	0.17018
IFRD1	0.170145
H1-10	0.170106
MYL12B	0.169798
ARL4D	0.169637
PRDX1	0.169533
RCN1	0.169511
TMED5	0.169462
ANKRD37	0.169426
GPX1	0.169399
DUSP10	0.169397
RBBP4	0.169373
UBE2M	0.169282
HADHA	0.169266
EAPP	0.169069
CFAP210	0.168945
STXBP5	-0.168877
A1BG	0.168742
DGUOK	0.168572
NDUFB7	0.168517
CADM1	0.1685
FAM118A	0.168416
BACE2	0.168369
POMP	0.168266
TAF4B	0.168173
CMC2	0.168085
HNRNPM	0.168056
ARF1	0.16789
NUDC	0.167887
TAF13	0.167755
S100A10	0.167715
H2BC15	0.167655
DUSP14	0.167605
WDR83OS	0.1675
TMED2	0.167455
NDUFV2	0.167256
ARID4A	0.167155
CCDC124	0.167071
CAMLG	0.167041
TLE4	0.166897
WDR74	0.166882
GLRX5	0.166823
GTF2A2	0.166811
HNRNPA3	0.16674
UQCRFS1	0.166718
HEXIM1	0.166679
UQCR11	0.166676
MYL6	0.166663
SUMO1	0.166571
PPARGC1A	-0.166435
PSMA7	0.166434
NAA20	0.16606
KBTBD2	0.165954
UBE2D2	0.165866
NFIL3	0.165785
SERPINE1	0.165719
CHST9	-0.165668
PIGA	0.165582
NPAS3	-0.165383
CLEC11A	0.165114
PSMA5	0.165109
H2BC12	0.165081
CELF2	0.165068
LAPTM4A	0.164991
MT-ND6	-0.164909
GNB2	0.164816
FDFT1	0.16481
RHOA	0.164802
CDKN1A	0.164802
TIMM10	0.164691
HBEGF	0.164543
CNBP	0.164538
ZNF581	0.164484
LAMA1	0.164476
MRPL34	0.164427
EIF5B	0.164353
CD55	0.164262
NDUFB9	0.164211
AFF4	0.16411
TAF7	0.164051
ZFAND5	0.164014
NDUFA2	0.164005
PFN1	0.16397
NETO2	0.163652
MRPS15	0.163617
PPP2R2A	0.163613
ATP1B3	0.163545
NFKBIB	0.163534
MMADHC	0.163514
SF1	0.163469
TMEM123	0.163461
NDUFB2	0.163236
AHR	0.163169
TNFRSF10B	0.16313
MAP2K2	0.163041
ITPA	0.162962
TMEM219	0.162943
CHD2	0.162905
PHB1	0.16283
HNRNPR	0.162829
NUTF2	0.162776
MRPS24	0.162767
PCNA	0.162754
BRK1	0.162744
KPNB1	0.162723
IDI1	0.162656
LMCD1	0.162629
ACTG1	0.162566
PRDX2	0.162553
PSMD9	0.162542
NFKBIZ	0.162479
ATP6V0C	0.162271
PRPF40A	0.162188
LSM8	0.162087
SDHAF3	0.162064
STAU1	0.162026
SELENOH	0.161873
ROMO1	0.161861
KCNQ1	0.161793
SAT2	0.161773
EIF4H	0.161619
NEDD9	0.161552
CTH	0.161527
ATP6V0E1	0.161519
FKBP11	0.1615
HNRNPUL1	0.161423
SERF2	0.161374
NEU1	0.161293
IVNS1ABP	0.161293
ASPHD1	0.161172
CACYBP	0.161036
SQLE	0.160904
PRPF38B	0.160901
DCXR	0.160842
PRDX5	0.160822
NAPA	0.160766
COPS2	0.160735
TAF10	0.160733
SPATA13	0.160623
UAP1	0.160598
TXNDC5	0.160556
CD82	-0.160489
MT-RNR1	-0.160431
NABP1	0.160418
EXOSC4	0.160408
C11orf58	0.160393
EGR3	0.160358
RNF7	0.160318
ATP5F1A	0.160303
MTPN	0.160284
PNN	0.16027
NUP153	0.160239
EIF2A	0.160234
COPE	0.160201
PET100	0.160079
LGALS3BP	0.159977
KLF10	0.15996
DNAJC8	0.159852
HMGN3	0.159846
HMGCR	0.159784
SNRPC	0.159584
YY1	0.159542
VPS28	0.159507
NDUFB1	0.159503
IQGAP1	0.159429
CITED2	0.159366
HMGN2	0.159344
HSPA4	0.159343
EID1	0.159233
PHPT1	0.159169
GLS	0.159165
TFAP2C	0.159107
GGCT	0.159044
METTL26	0.159031
GOLGA7	0.159009
SPRY4	0.158809
HDLBP	0.158736
YWHAE	0.158597
DAZAP2	0.158566
TMEM230	0.158543
PLCL1	-0.15853
SMDT1	0.158457
MDH2	0.158451
FBXO7	0.158414
ZC3H13	0.158392
ANAPC11	0.158382
ITM2B	0.158374
ATP1A1	0.158191
MDH1	0.158179
ZNF428	0.158178
RAC3	0.158113
GSTO1	0.158083
SELENOK	0.158041
KDELR1	0.157949
TXNL1	0.157944
SLCO4A1	0.157868
TMED3	0.157623
TIMM9	0.157504
SNX5	0.157459
EIF6	0.157412
ABHD5	0.15738
FGF9	0.157271
LSM2	0.157237
GRPEL1	0.157172
VDAC1	0.157162
ISCA1	0.157007
MGST3	0.157006
GNAL	0.156982
FEM1B	0.156846
MFF	0.156666
PYCARD	0.156662
COX16	0.156659
UTP11	0.156656
RBM25	0.15662
MEIS2	0.156598
SAV1	0.156491
CHRAC1	0.156473
TXNDC17	0.156439
PPM1D	0.156413
SNAI2	0.156412
BCLAF1	0.156282
NOP16	0.156105
MICOS13	0.156088
PRKCSH	0.156042
RAD23A	0.156035
PRDX3	0.15596
SSBP1	0.155918
MT-ND4L	-0.155648
MRPL4	0.155586
NDUFA11	0.155578
HPGD	-0.15548
ABHD17B	0.155331
MRPL40	0.155146
NRBF2	0.155103
PPM1G	0.155082
PDAP1	0.155048
PAICS	0.155035
CHURC1	0.154988
IFITM3	0.154967
SLC16A7	-0.154961
NSG1	0.154928
NDUFB3	0.154923
ZFAND1	0.154843
GABARAP	0.154806
PHF5A	0.154798
CDKN2AIP	0.1547
TSPYL2	0.15466
REL	0.154607
TRMT10C	0.154522
KRTCAP2	0.154477
LETMD1	0.154451
KHDRBS3	0.154429
RNF139	0.154251
SLC1A5	0.154165
SLC4A4	-0.154151
MRFAP1	0.154063
PGAM1	0.154009
ETFB	0.153961
TIMM8B	0.153921
CCT7	0.153915
NGRN	0.153852
TMBIM6	0.153712
ERF	0.153483
CLIC1	0.153476
RTN4	0.15344
RCN2	0.15341
CDK2AP1	0.153343
DSTN	0.153317
SGIP1	-0.153239
ANAPC5	0.153233
HNRNPH3	0.153074
ZCCHC17	0.15303
SERTAD3	0.15286
POLR2H	0.152808
MRPL14	0.152788
SNX10	0.152746
ABRACL	0.152662
ATP5ME	0.152649
NDUFV1	0.152607
EMP1	0.152584
PTRH2	0.152427
CDK4	0.152388
FERMT2	0.152377
NDUFA3	0.152353
CSRNP1	0.152291
PIM3	0.152195
GTF3C6	0.152187
WTAP	0.15211
PITPNB	0.152084
NDUFC1	0.152023
RND3	0.151886
FTH1	0.151825
GSPT1	0.151822
RGS10	0.151699
ERRFI1	0.15168
PCBD1	0.151669
PTDSS1	0.151631
PFDN6	0.151595
FXR1	0.151495
HNRNPD	0.151388
CAPRIN1	0.151388
SDF4	0.151253
LRRC23	0.151222
TAGLN2	0.151206
RAB5IF	0.151183
USE1	0.151166
CD9	0.151073
CEP170	0.151017
G3BP2	0.151002
MRPS34	0.150986
CTSH	0.15093
POLR2K	0.15085
FAM210B	0.150776
PPP3R1	0.150774
GPM6B	0.150768
DNAJC15	0.150624
UBE2L3	0.15053
DDIT3	0.150455
MAT2A	0.150361
TPGS1	0.150355
ADRM1	0.150293
DDX39A	0.150256
LAMTOR1	0.15025
RIMS2	0.150191
SEPHS2	0.150175
TIMM17A	0.149937
PHLDA2	0.149865
EI24	0.149854
PAFAH1B3	0.149599
BRI3	0.149515
TMEM205	0.149457
NOL7	0.14944
FAM177A1	0.14936
LUZP1	0.149262
HBP1	0.149186
MIDN	0.148926
EMC4	0.148867
DCAF13	0.148759
COX7A2	0.148756
IFI16	0.148748
LRRFIP1	0.148743
NDUFS3	0.148708
MAPK1IP1L	0.148687
TCEAL4	0.148673
ALYREF	0.148576
NDUFB4	0.148575
SPCS1	0.14857
ZNHIT3	0.148413
TMEM26	-0.148377
OLA1	0.148347
TTLL7	-0.148338
THBD	0.14829
COMMD3	0.148285
VEGFB	0.148228
GCNT2	0.148195
CNTN6	-0.148121
TALDO1	0.148096
C1orf52	0.148009
TIPARP	0.148008
LY6E	0.148002
LARS1	0.147968
KLF5	0.147909
ATP6V0B	0.147895
YPEL5	0.147887
MAX	0.14784
AFMID	0.147805
C5orf24	0.147671
MT-ATP8	-0.147618
TSTD1	0.147583
NUCB1	0.14755
CHCHD10	0.147515
UPF3A	0.147469
DNAJA4	0.147285
ATG101	0.147279
ATOX1	0.147273
GADD45GIP1	0.147232
NME4	0.147213
MRPL41	0.147115
TRAPPC3	0.147057
REXO2	0.14703
ARF5	0.147002
LYPLA2	0.146931
SLC39A4	0.146921
ARID5B	0.146899
ICAM1	0.146765
SOCS3	0.146505
RNF10	0.146471
NDUFAB1	0.146378
H2BC4	0.146356
DENR	0.146313
CDC34	0.146283
TMEM256	0.146282
LSM5	0.146228
ATP6V1F	0.146209
PGK1	0.146171
PSME2	0.146104
RBMS3	-0.146056
CYC1	0.146047
MVB12A	0.146016
NUDT14	0.14596
TNS1	-0.145934
DUT	0.145914
LSM1	0.145904
CDK2AP2	0.145882
PRKAR1A	0.145879
TMED9	0.145824
ANP32A	0.145664
GUK1	0.145572
BEX4	0.145444
RAD23B	0.145084
IRF1	0.144997
CHD4	0.144992
CFAP97	0.144912
TRAF4	0.144894
POLE4	0.144878
PRPF6	0.144838
NXF1	0.14471
UQCRC2	0.144667
DCUN1D5	0.144665
DKC1	0.144539
PDIA6	0.144537
GNB1	0.144487
CRTAP	0.144486
MBNL2	0.144479
HMG20B	0.144431
RAB17	0.144396
NFE2L2	0.144373
RNPS1	0.144312
RAB7A	0.144268
HDGF	0.144243
PSMB2	0.144223
ZNF503	0.144207
DEK	0.144201
CAP1	0.144159
ZNF10	0.144148
CPN1	0.144138
PPP1R2	0.144127
PAK1IP1	0.144087
VKORC1	0.144086
KLHL15	0.144074
MRPL12	0.144049
YTHDF3	0.144021
FIS1	0.144008
BCL6	0.143987
MYL6B	0.143971
MRPL21	0.143933
PDE4D	-0.143889
GNL2	0.143836
SYNGR1	0.143767
MRPS26	0.143739
PSME1	0.143728
CIAO2A	0.143673
FNDC10	0.14354
ITGB1	0.143526
UFM1	0.143436
NOP2	0.143434
CHKA	0.14343
SELENOF	0.143401
NDUFA12	0.143373
SEMA6D	-0.143357
NECTIN2	0.143315
SQSTM1	0.143243
NR2F2	0.143156
TKT	0.143083
ISYNA1	0.143078
GMFB	0.143027
KIF1B	0.142989
MYDGF	0.142978
IER5L	0.142965
IP6K2	0.142921
RAP2A	0.142891
SF3B5	0.142784
LITAF	0.142783
UQCRHL	0.142772
CD44	0.142767
ISOC2	0.142765
TMEM59	0.142657
ADRB2	0.142617
PSMC6	0.142609
RTF1	0.142605
SAP30	0.142583
BAMBI	0.142549
CDC42EP5	0.142528
COPB1	0.142527
TECR	0.142503
BUD23	0.142419
IFITM1	0.142409
EGR2	0.142316
SDHD	0.142311
BEX3	0.142271
CDV3	0.142267
KDELR2	0.142217
RAB38	0.142159
SDHB	0.142134
QARS1	0.142024
ODC1	0.141975
ADSS2	0.141967
COA8	0.14193
YTHDC1	0.141907
YDJC	0.141888
MAZ	0.141861
CANX	0.141848
SCAF4	0.1418
MT1X	0.141781
CTR9	0.141754
HSF1	0.141693
CCNK	0.141614
ZBTB20	-0.141583
MRTO4	0.141571
EXOSC8	0.141564
FKBP5	-0.141437
UTRN	-0.141415
PSMG2	0.141357
PUF60	0.1413
ZMYM5	0.141266
CAMK2N1	0.14116
DHX9	0.141127
TBX3	0.141079
ACTN4	0.141057
PDGFD	-0.141056
MRPL18	0.141036
GPX4	0.14097
SPATC1L	0.140965
TFAM	0.140945
VCPKMT	0.140943
SYTL2	-0.140938
RAB2A	0.140932
TCEAL8	0.140864
RGS3	0.140851
POLR2A	0.140782
HNRNPH1	0.140681
FKBP4	0.140675
PNKD	0.140581
INSIG1	0.140542
RBM4	0.140474
PPP1R15B	0.140447
DIPK2A	0.140342
SLC12A5	0.140271
RYBP	0.140244
SURF4	0.140142
STOML2	0.140138
PCF11	0.140086
DBF4	0.139923
THRAP3	0.13992
BTF3L4	0.139902
CHD1	0.139885
NRARP	0.139884
BOD1	0.139747
ESD	0.139695
SFRP1	0.13965
PPP4C	0.139475
IRF4	0.139353
PSMD8	0.139329
DZIP1	0.139319
TACC2	0.139292
NOCT	0.139226
MRPL11	0.139144
MT-CO3	-0.138793
SLC25A36	0.138749
SPAG9	0.138685
NDUFB6	0.138579
IMP3	0.13846
GARS1	0.138391
FRY	-0.138358
TSPAN4	0.138275
MTDH	0.138272
MRPS6	0.13826
MET	-0.13822
C11orf1	0.13818
RNF11	0.138109
ARPC5	0.138081
DCTN2	0.138072
TIGAR	0.138047
ILF3	0.137974
MGAT1	0.137932
AKIRIN2	0.137892
RLIM	0.137885
HOXB7	0.13785
NR4A3	0.137801
MRPS12	0.137798
PIK3R3	0.137779
TLE3	0.137767
BNIP2	0.137699
CYB5R3	0.137675
SHMT2	0.137635
ACOT7	0.137587
PAPOLA	0.137563
SEMA5A	-0.137551
DRAP1	0.137463
MAF1	0.137463
HSPA2	0.137453
EVA1C	-0.137443
CTNNAL1	0.13743
POLE3	0.137328
VEPH1	0.137213
PRXL2C	0.137179
EMC10	0.137153
TUBB2B	0.137078
RBM7	0.137049
TMEM147	0.136953
SMIM4	0.136944
SOX9	0.13674
NFATC1	0.136682
SLC25A4	0.136677
CTHRC1	0.136606
ZNF121	0.136533
GHITM	0.136485
FAM136A	0.136483
CEBPZ	0.136435
MSX2	0.136392
GTF2F1	0.136247
ZNF326	0.136154
JMJD6	0.136067
MRPL44	0.136039
CENPX	0.136037
FKBP3	0.135917
EIF4EBP1	0.135907
BLOC1S6	0.135903
PLEKHG1	-0.135862
URM1	0.135839
HTRA1	0.135829
PDCD4	0.135746
LSM3	0.135738
PSMB1	0.135712
DNAJC3	0.135696
GNAS	0.135588
SPTY2D1	0.135501
MSN	0.135383
MSRB2	0.135257
CSPP1	0.135207
SESN2	0.135183
IRF2BP2	0.13516
EPHA4	0.135135
SMNDC1	0.135004
UBXN4	0.134965
NAV3	-0.134922
RNLS	-0.134856
TMEM126A	0.134825
POLR2E	0.134823
TSC22D2	0.134809
S100A6	0.134759
OTUB1	0.134687
SPRY1	0.134573
CCN2	0.134568
ALDOA	0.134533
BOP1	0.134507
BOC	-0.134361
RIPK4	0.13423
PPP1CA	0.134163
AIMP1	0.134156
WSB1	0.134066
GRINA	0.133965
DDX18	0.133931
TSEN34	0.133927
EMP3	0.133883
ESRRA	0.133875
TMEM14B	0.13381
CHCHD5	0.133803
PTBP1	0.13371
NDUFA5	0.133706
CUEDC2	0.133664
CCDC43	0.133623
SCAND1	0.133574
TEX14	0.133564
SNAPC2	0.133564
RHOC	0.133546
WNK1	0.13352
RALBP1	0.133513
EMD	0.133485
ARHGDIA	0.133475
UBA2	0.133436
RNF114	0.133414
ALKBH2	0.133391
UQCC2	0.133378
EEF1E1	0.133302
RCOR1	0.133292
KPNA4	0.133212
PTOV1	0.133203
WEE1	0.133182
STK17A	0.133155
HEY1	0.133128
NDUFS6	0.133085
ANAPC16	0.133031
DNAH2	0.133005
FEM1C	0.132926
SAMM50	0.132923
COL6A2	0.132874
SUGT1	0.132874
KMT2E	0.132852
C20orf27	0.132852
SNAI1	0.132834
HK2	0.13278
NPDC1	0.132735
PRELID3B	0.132646
COX20	0.132596
HS3ST5	-0.132499
YRDC	0.132439
ATG14	0.13237
LAMB1	0.132338
POLR2G	0.132306
FAM83D	0.132287
BNIP3	0.132216
SND1	0.132182
HADHB	0.132178
TMEM97	0.132173
DPH3	0.132153
PBDC1	0.132096
RABGEF1	0.132061
PRDX4	0.13199
PRPF4B	0.131944
NPM3	0.131904
NDRG1	0.131866
AP1S1	0.131809
CORO1B	0.13172
C1orf43	0.131698
AAMP	0.131696
BMI1	0.13166
NINJ1	0.131643
SRP9	0.131627
CYSTM1	0.131603
ATP2A2	0.13155
STOM	0.131511
NDUFB10	0.131502
XRCC5	0.131483
RPN2	0.131457
ZFTRAF1	0.131394
GPATCH4	0.131389
COA4	0.131242
ACP1	0.131218
TXNDC12	0.131162
FBXO32	0.131136
PARD3B	-0.131113
CMPK1	0.131099
ETHE1	0.131088
S100A13	0.131074
AP1S2	0.13107
ABL2	0.131003
AKR1A1	0.130989
APP	0.130894
MATR3-ENSG00000280987	0.130875
GCH1	0.130813
RER1	0.130797
STX5	0.130757
TWF1	0.13074
MRPS2	0.130736
TMEM243	0.130664
PRKN	-0.130639
PYCR1	0.130601
FSTL5	0.130599
ATRAID	0.13057
KCNE4	-0.130553
LTBR	0.13055
BOLA3	0.130542
SSR3	0.130542
GGNBP2	0.130537
PYY	-0.130535
ARPC5L	0.130524
PSMD7	0.130522
CEBPD	0.130516
CYRIB	0.130509
ANKRD36	-0.130474
NR3C2	-0.130144
SYAP1	0.130063
PANK2	0.130004
HMGA1	0.129961
CDCA7	0.129954
TUSC3	0.129875
NOPCHAP1	0.129853
JAM3	0.129843
KCNQ5	-0.129836
NBDY	0.12982
PAIP2	0.129802
TMEM101	-0.129798
CD151	0.12977
DGCR6L	0.129697
GTF2F2	0.129667
SLC25A32	0.129657
TRPM1	-0.129628
FAM174C	0.129622
ACP5	0.129591
C11orf24	0.129563
COA6	0.129543
H2BC5	0.129543
TM9SF3	0.129543
HDDC2	0.129409
VMP1	0.129388
ATAD2	0.12935
MRPL24	0.129303
NOC2L	0.129279
PLEKHA5	0.129238
HOXC10	0.129215
PLTP	0.129209
DPY30	0.129175
ARPP19	0.129166
POLR1C	0.129163
ECHS1	0.12915
JOSD1	0.129103
PSENEN	0.12902
C1orf122	0.129017
TRMT12	0.12889
APOD	0.128865
USP6NL	0.128799
FDX1	0.128776
DPP10	0.128774
MPLKIP	0.128765
LBH	0.128759
POP5	0.128752
RNF138	0.128749
NME3	0.128666
FAM200B	0.128647
SRP19	0.128523
PTN	0.128507
GJC1	0.128463
GNG2	0.128451
TATDN1	0.128372
RASD1	0.128342
SYN3	0.12829
POLR2I	0.128283
SUMF2	0.128276
PGM2L1	0.128237
H1-0	0.128237
STRADB	0.128224
NR2F6	0.128146
ABHD3	0.12813
CSKMT	0.128107
LRPAP1	0.128095
HP1BP3	0.128088
LAPTM4B	0.128077
EMC7	0.127955
CHMP2A	0.127946
VPS51	0.127926
IDH3B	0.127917
SRSF11	0.127856
BFAR	0.127799
NDUFB5	0.127759
TPD52	0.127727
DNAJC2	0.127676
SYNPR	-0.127622
PTPN12	0.127575
LZIC	0.127574
SLC25A1	0.127441
MIA	0.127318
CIAO2B	0.127312
CPXM1	0.127242
STUB1	0.127226
TBCB	0.127205
GNAI3	0.12719
MT-CO1	-0.127159
MED19	0.127111
TNFAIP3	0.127086
MRPL43	0.127045
ZFAND2A	0.127016
DNTTIP2	0.126975
KLHL28	0.126972
DNPH1	0.126972
SF3B2	0.126896
HDAC1	0.126881
LRRC61	0.12688
TMEM165	0.126858
TIMP1	0.126843
MRPL16	0.12679
EZH2	0.126761
DPP7	0.126726
MGST1	0.126687
ACOT2	0.126682
BCCIP	0.126574
MRPL32	0.126544
NUDCD2	0.126504
HPS5	0.12642
STMP1	0.126413
GLMP	0.126347
PACSIN2	0.126308
ATIC	0.126301
TMEM160	0.126211
RNF19B	0.126162
SAFB	0.126144
MRPL33	0.12613
RBFOX2	0.126033
SMIM19	0.125978
KDM5B	0.125894
CNIH4	0.125815
CWC15	0.125802
PSME4	0.125767
CDH19	0.125729
UBE2A	0.125649
RBMX2	0.125647
TAFA5	0.125632
PHTF1	0.125574
PPP2R1A	0.125484
MFSD10	0.125481
DDX49	0.125471
NDUFS8	0.12546
SERTAD2	0.12545
CZIB	0.125443
CDC123	0.125315
H4C8	0.125278
RNF5	0.125207
GRHPR	0.125182
MAPKAPK2	0.125096
MRPS16	0.125084
DIMT1	0.125075
MRPL47	0.125017
BCL2L13	0.124991
MPG	0.124976
FAM107B	0.124966
SELENOS	0.124949
IL6ST	0.124945
UROD	0.124942
H2AZ2	0.124928
TIMM23	0.12492
RPAIN	0.124903
TARS1	0.124882
FER	-0.124778
USP1	0.12474
STK32A	-0.124726
DNAJB4	0.12465
GGH	0.12459
SRGN	0.12453
B3GAT3	0.124523
SMC4	0.124447
PAF1	0.124441
TAMALIN	0.124421
COPS5	0.124413
PCLO	-0.124397
GMPR	0.124383
PHC2	0.124372
RDH11	0.124331
NRCAM	0.124308
NPTX2	0.124287
CNN3	0.124213
PRPF38A	0.124161
FABP7	0.124061
GLO1	0.123978
PRDM2	0.123942
DMKN	0.123928
RPL7L1	0.123924
PHACTR4	0.123911
SRI	0.123905
OS9	0.123897
KCNJ13	-0.123884
UTP23	0.123767
SOCS1	0.123752
PES1	0.123681
BAG1	0.123672
ANKRD42	0.123655
EPS8	0.12352
DCTN3	0.123501
NT5C	0.123479
AFF3	-0.123471
PDCD2	0.123421
PRR7	0.12339
MT-ND1	-0.123362
KRAS	0.123346
FCGRT	0.123308
DR1	0.123278
GPBP1	0.123274
SPAG7	0.123265
BUB3	0.123175
NOA1	0.123142
NAT14	0.123042
YIF1B	0.12298
ANGPTL7	0.122946
P2RX7	0.122894
RAB13	0.122886
PRR13	0.122842
ABCB5	-0.122821
GAR1	0.122811
MOAP1	0.122788
AKT1	0.122768
DNAJB11	0.122737
NFE2L3	0.122717
TYW3	0.122684
C8orf82	0.122666
RAMP2	0.122649
MAD2L2	0.122603
FAM162A	0.122599
TAF9	0.122536
PTPN1	0.122522
CHCHD7	0.122496
NTAN1	0.122447
NAALADL2	-0.122444
ANKRD36C	-0.122419
C4orf47	0.122394
VCL	0.122339
IMP4	0.122316
TPRKB	0.1222
NUFIP1	0.122186
SNX6	0.122172
ARL6IP5	0.122129
DEDD2	0.122077
FRZB	0.122054
CDKN1C	0.121921
PEBP1	0.121918
AHNAK	0.121897
PUM1	0.121875
CAPNS1	0.121862
LIMD2	0.121847
DLST	0.121758
GTPBP4	0.121734
WASF2	0.121635
RAD21	0.121627
UBQLN1	0.121623
ACBD3	0.121603
GSTK1	0.121602
SUPT16H	0.121545
ATRNL1	-0.121544
CUL3	0.121467
CPQ	-0.121464
LDAF1	0.121357
CENPF	0.121353
ACTN1	0.121271
CES1	0.121224
RAB1B	0.121175
ZNF652	0.121171
SF3A3	0.121046
GEM	0.121035
TPST2	0.12102
TMEM251	0.120994
DRG1	0.120987
UBE2Q2	0.120917
PSMF1	0.12089
FUNDC2	0.120803
NCBP2	0.120769
UFD1	0.120662
TPST1	0.120658
TP53BP2	0.120635
MARCKS	0.120613
IRF2BPL	0.120605
C14orf119	0.120571
PEG10	0.120558
TIMP3	0.120537
SEC13	0.120502
ZNRD2	0.120489
TOR1AIP2	0.120486
SLC25A39	0.120465
FKBP14	0.120455
SHARPIN	0.120401
CLNS1A	0.120384
NAA38	0.120359
ZNF536	0.120328
PSMB3	0.120326
SPINDOC	0.120287
BCL3	0.120286
HDAC2	0.120273
CCNYL1	0.120257
NOSIP	0.120186
ARC	0.120061
MAGT1	0.120053
MT-CYB	-0.120016
MOB4	0.119995
MFSD14B	0.119945
ARL5B	0.119932
YIPF3	0.119893
APH1A	0.119882
NGDN	0.119837
DNAJA2	0.119812
SRA1	0.11981
CD99	0.119806
TXNRD1	0.119802
CDC5L	0.11974
PPIG	0.119736
SOD2	0.119682
PPCS	0.119648
SMIM30	0.119613
MECOM	0.11959
FASTKD2	0.119541
MGME1	0.119529
MTFP1	0.119476
KDM5A	0.119443
STXBP1	-0.119441
TMX1	0.119429
MFSD12	0.119392
EMC6	0.119356
ZNF644	0.119289
PEF1	0.119288
PPIL4	0.119284
TRAF7	0.119282
ANP32E	0.119256
GORASP2	0.119229
BTBD1	0.119229
IPO5	0.119224
ZC3HAV1	0.119213
PNPLA8	0.119182
MT1A	0.119136
ODF2L	0.119123
NDUFA13	0.119028
RNF145	0.118983
ELMO1	-0.118952
NOB1	0.118942
LUC7L2	0.118903
ADAMTS19	0.1189
NANS	0.118893
SRSF8	0.118806
TAOK3	0.118769
LAMTOR2	0.118766
NELFCD	0.118761
RAB24	0.118752
FKBPL	0.118641
SKIL	0.118628
NFKBIL1	0.118624
RAB10	0.118616
MID1IP1	0.118575
NOL12	0.118567
PLEKHF2	0.118517
CSGALNACT1	0.118469
ATP6V1E1	0.118451
C15orf61	0.118441
TRIP6	0.118427
SDF2L1	0.118415
TAX1BP1	0.118391
FUBP1	0.118315
PPIF	0.118284
PAXX	0.118276
MYG1	0.118263
RCC2	0.118179
METTL9	0.118168
NECAP2	0.118167
EPHA2	0.11816
PSMA4	0.118145
CHIC2	0.11813
MRTFA	0.118102
TAF12	0.118089
PSMC3	0.118079
SLC39A1	0.118076
CHCHD6	0.118058
OCIAD1	0.118028
MT1F	0.118003
HOXC9	0.117924
RAP1B	0.117907
NUCKS1	0.1179
NAP1L4	0.117803
TTC19	0.117784
SPEN	0.117766
SCARF2	0.117748
TMBIM4	0.117746
EIF4E2	0.117745
ZNF146	0.11773
ARL5A	0.117711
RFXANK	0.117706
ABCF1	0.117688
PNKP	0.117683
PSMC5	0.117675
GNG10	0.117644
TPM4	0.11758
CALD1	0.117576
RGS16	0.117547
LPCAT2	0.117464
NEFH	0.117429
TYMP	0.11738
LAMP1	0.117378
EXOSC5	0.117362
PARVB	0.117357
UBE2I	0.117346
ETV3	0.117239
GALE	0.11722
THOC7	0.117198
G3BP1	0.117164
COMT	0.117138
NCBP2AS2	0.117131
ZMAT2	0.117097
PHLDA3	0.117077
TRIAP1	0.117075
TENT5C	0.117007
NDUFV3	0.117007
TAF11	0.117
ADPRS	0.11694
TLE5	0.116935
MRPS18B	0.116894
SLC25A25	0.11686
RBM38	0.116819
TMEM167A	0.116754
C22orf39	0.116752
GART	0.116565
ANXA1	0.116562
MRPS30	0.116509
CHMP5	0.116482
ZNF703	0.116444
CAPZB	0.116423
TRABD	0.116379
MPC2	0.116352
PDK4	0.116338
TDRP	0.116276
DCTD	0.116256
TMEM70	0.116253
SLBP	0.11625
TFG	0.116248
ERVK3-1	0.116186
CLPP	0.11614
DMD	-0.116082
RBCK1	0.116019
SON	0.116013
PSMG4	0.115995
TRNAU1AP	0.115991
MRPL37	0.115975
SLC13A3	0.115947
SLTM	0.115922
AGTRAP	0.115913
SRP72	0.115891
CKS1B	0.115872
RGPD2	0.115865
POLG2	0.115769
SEZ6L2	0.115745
GLDN	-0.11574
HAUS4	0.115626
ZMAT3	0.115619
METTL5	0.115588
UTP14A	0.115483
BCHE	0.11544
YJEFN3	-0.115382
SF3A2	0.115327
TANC1	0.115323
HPSE2	0.115316
ADIPOR2	0.115243
ZNF844	0.115218
NIPA2	0.11521
SF3A1	0.115134
MXD1	0.115097
ZNF207	0.11506
LLPH	0.115007
IMPA1	0.114976
RAB5A	0.114974
PLK3	0.114959
RINL	0.114955
UQCC3	0.11491
PSMD12	0.114873
DDX6	0.114834
CAVIN3	0.114743
DAP3	0.114664
PPP2CB	0.114634
SORD	0.114601
HOXA10	0.114571
SNAP29	0.114564
ENTR1	0.114497
LTA4H	0.114478
ACO2	0.114465
CDC26	0.114443
ORC6	0.114434
CASP4	0.114384
LSM10	0.114364
RAB11B	0.114357
ACOT11	-0.114352
PSMD14	0.114342
MCRIP1	0.114328
TMCO1	0.114273
RXYLT1	0.114173
S100A11	0.114164
ABHD17A	0.114124
MRPL42	0.11411
AIMP2	0.114082
LAP3	0.114082
PFN2	0.11406
URI1	0.114018
METTL23	0.113911
USP16	0.113884
ATF1	0.113867
TOP1MT	0.113834
ETFRF1	0.113822
SUMO3	0.113774
ELOF1	0.113752
SCAF11	0.113692
TARDBP	0.113649
MRPL54	0.113597
NIP7	0.113582
DUSP2	0.11357
MT-ND5	-0.113559
DDB1	0.11351
NUP50	0.113498
C16orf72	0.113496
SSNA1	0.113483
CARD16	0.113483
MCUR1	0.113458
EIF4G1	0.113436
VTI1B	0.113413
KLF9	0.11336
MOK	0.113357
CRIP2	0.113309
RNMT	0.113296
CS	0.113251
PIH1D1	0.113237
MRPS18C	0.113225
MGST2	0.113201
PRPF31	0.113194
POLR3H	0.113154
ANKRD10	0.113131
USP38	0.11311
GATD3	0.113098
LYSMD3	0.113079
RGS2	0.113036
HM13	0.113034
[truncated: 17,812 more rows]

## Sheet: Supplementary Table 3
Hypometabolic_Rambow18	Invasive_Rambow18	Mitosis_Rambow18	NCSC_Rambow18	Pigmentation_Rambow18	Starved_Rambow18	Melanoma.MLG_Rambow24	Neural.Crest.Like_Pozniak24	Interferon.Alpha.Beta.Response_Pozniak24	Melanocytic_Pozniak24	Mesenchymal.Like_Pozniak24	Mitochondrial_Pozniak24	Antigen.Presentation_Pozniak24	Mitotic_Pozniak24	Stress.p53_Pozniak24	Stress.Hypoxia_Pozniak24
PKM	VCAN	ANLN	SEMA3B	SNAI2	SLC7A8	ERBB3	DCSTAMP	DPP6	RPS7	PDGFRB	MGP	HLA-DRA	E2F2	MALAT1	VEGFA
TYR	TNC	TACC3	IGF1	RAB27A	DLX5	CDH19	COL8A1	PKHD1	RPS18	NRP1	APOE	HLA-DPA1	ESCO2	NEAT1	NDUFA4L2
PGM1	BCAT1	SPAG5	ATP1A2	TYR	TRIM67	PTPRZ1	NGFR	LINC00323	RPS23	COL5A1	MT-ATP8	HLA-DPB1	PKMYT1	POLR2J3.1	FLNB
PHGDH	FOSL2	NDC80	VCAN	GPR143	ARMC7	PLP1	AXL	PCSK2	RPL7A	COL1A1	MT-ND6	GBP1	ASF1B	GABPB1-AS1	NXPH4
PGK1	UNC5B	TPX2	NGFR	TYRP1	CD36	SOX10	MRC2	IFIT1	RPL12	COL3A1	DST	HLA-DRB5	RRM2	SON	SLC16A3
TUSC3	CCL2	BIRC5	ITGA6	MLPH	PAX3	EDNRB	BMP8B	OAS2	RPS6	LUM	APP	HLA-DQA1	KIFC1	N4BP2L2	ENO2
GAPDH	COL1A1	KIF4A	SLC22A17	MLANA	RNF121	S100B	ECE1	PALMD	RPS13	THY1	PCDH7	HLA-B	CLSPN	RBM39	AK4
LDHB	SH2B3	CDKN3	PDGFB	APOE	SLC25A48	ST3GAL6	NTM	TFAP2B	RPS14	TCF4	NFIA	HLA-DMA	FAM111B	PLEKHA5	PGK1
DHCR24	MGP	MYBL2	PLAT	TRPM1	IP6K3	ADGRG1	TNC	CTXND1	RPS3	ID3	KCNJ10	HLA-DQB1	SPC25	FUS	P4HA1
PRDX6	VEGFA	CDC25B	TMEM176B	EDNRB	UBXN10	MCAM	PMEPA1	APCDD1	RPL41	PMEPA1	RNASE1	HLA-E	EXO1	HPS4	IGFBP5
RPN2	LOX	FOXM1	COL1A1	KIT	MYORG	LGI4	FREM2	LGI3	RPS15A	MRC2	MT-ND5	CIITA	PBK	RSRP1	ADM
ACAT2	FGF1	GMNN	CNN3	SLC45A2	LSMEM1	SOX6	ITGB8	EIF1AY	RPL9	DCN	PTPRZ1	HLA-DMB	MYBL2	MDM4	PDK1
AMD1	PDGFRB	TTK	ADGB	FABP7	FRAT2	TFAP2A	COL4A1	ANGPT2	RPS8	COL1A2	MOXD1	TAP1	RAD51AP1	RNMT	GSTM3
ACSL3	IGFBP5	KNG1	ATP1B2	PMEL		ITGA6	SLC20A1	MX1	RPL8	COL4A1	DDX17	HLA-DRB1	DTL	KCNQ1OT1	ALDOC
ACSS2	ERRFI1	CENPA	MATN2	SLC24A5		SORBS2	LOXL3	SLC1A4	NACA	MXRA8	NES	HLA-C	NCAPG	HNRNPU	PFKFB4
LDHA	PRDX1	CDC20	SYT11			S100A1	OLFML3	LY6E	RPL32	TMSB4X	SPP1	RARRES3	NCAPH	SFPQ	GAPDH
BAAT	TGFBI	STMN1	ANXA1			DUSP4	COL5A2	GNG11	RPL30	COL6A2	MTRNR2L12	PSMB9	CDK1	CCNL1	BHLHE40
ALDH1A1	IL13RA2	NEK2	LAMC1			PRAME	ITGA3	ISG15	RPL37	COL6A3	TBX2	STAT1	CDCA5	PPP1R15A	ANGPTL4
RRM1	SOX4	CENPF	GFRA3			GPM6B	IL1RAP	IFIT3	RPL6	COL5A2	XIST	IL18BP	NEIL3	ZNF704	ENO1
TK1	NES	ZWINT	RSPO3			SNCA	ITIH5	OAS1	RPL19	COL4A2	ZEB2	APOL6	TK1	VMP1	STXBP1
B3GNT2	LOXL2	DLGAP5	GFRA1			ATP1B1	IGFBP3	RAMP1	RPL35	COL6A1	MT-ND4L	B2M	CDC6	TCF25	SLC2A1
TYMS	SPRY2	TOP2A	ADAMTS4			AP1S2	COL12A1	ABHD2	RPL29	AQP1	ZBTB20	GBP4	MCM10	ATP6V0A1	SPP1
ALDH1A3	CDH13	RAN	MPZ			TUBB2B	THBS2	HR	RPLP1	FBLN1	MT-ND3	HLA-F	POLQ	THUMPD3-AS1	FN1
NDUFA4L2	LMO4	CCNB1	GFRA2			MIA	KCNN4	IFI27	RPL18A	IGFBP7	RBMS3	GBP2	SKA3	TAF1D	DDIT4
NDUFA4	RGS5	CDCA8	PRIMA1			CHD7	COL4A2	SEMA3D	RPL5	COL12A1	AEBP1	APOL1	NUF2	SPG7	MIF
ENPP1	RGS16	CKAP2	A2M			PAX3	LYPD1	IFI44L	RPS2	BGN	39326	CD74	UHRF1	MIR3142HG	C4orf3
RPE	DLX1	NUSAP1	NRXN1			LYST	CALU	SFTPC	RPS3A	PCOLCE	CLTC	HLA-A	MKI67	NKTR	TIMP3
	SLIT2	KIF11	CADM1			SYNM	KCNMA1	SCUBE2	RPS15	VCAN	MPZL1	IRF1	ANLN	ARID1B	HILPDA
	GPC3	CENPE	SLITRK6			CRYAB	FLRT3	XAF1	RPL10A	ANTXR2	NBL1	WARS	HJURP	SRSF10	ERO1A
	ADM	PLK4	THBS2			SEC11C	ITGA6	GMPR	RPS24	PBX1	TF	IFIH1	MELK	ARGLU1	PKM
	EDNRA	KIF2C	COL4A1			CADM1	ITGB3	CMPK2	RPL35A	HTRA1	NLGN1	TAPBP	NDC80	TRPM1	MDK
	CYSLTR2	NUF2	IL1RAP			COL9A3	ACTN4	KCNE4	RACK1	C1R	PLP1	LRP2	NUSAP1	ATM	SOX4
	DDAH1	CCNA2	S100A4			SERPINE2	MAP1B	HERC6	RPL10	SELENOM	MT-CO2	TAP2	TCF19	SMG1	LDHA
	PLXDC1	CDCA5	NLGN3			TYR	TNFRSF19	CD9	RPS27A	FBN1	NORAD	PSMB8	AURKB	CHD9	EGLN1
	VSNL1	MKI67	L1CAM			MICAL3	PTN	SOX9	RPL18	SPARC	MEGF10	PARP14	CCNA2	AC020916.1	SLC16A1
	COL1A2	SPC25	ITGA1			DCT	P4HB	MAL	RPL3	MARCKS	ERBB3	SERPING1	FOXM1	ANKRD28	SLC2A3
	DLC1	SKA1	AQP1			MEF2C	SCN9A	ADCY2	RPL14	FN1	TAOK1	TRIM22	CEP55	MICAL3	SERPINB6
	AXL	FBXO43				FMN1	ADAMTS1	IFI44	RPS19	COL15A1	MT-CO1	UBE2L6	E2F1	PNISR	FBXO7
	ANGPTL4	BUB1B				SSFA2	FNDC3B	NFATC2	RPS4X	PALLD	CEP170	ISG15	KNL1	PNN	TPI1
	IGFBP6	CCNB2				ATP1A1	ITGB1	MX2	RPL24	CALD1	FSTL1	HAPLN3	CDC25C	IVNS1ABP	ASPH
	COL3A1	CDC25C				HSP90AB1	LTBP1	USP18	RPL36	ITGA1	DDX5	PARP9	SPC24	JUN	GPI
	FABP4	KIF15				SORT1	NT5E	TGFBI	RPS9	POSTN	AKAP9	GBP3	SGO1	NHLRC3	BNIP3L
	CDH2	SGMS2				STMN1	SERPINE2	IFI6	RPLP2	CFH	SNX22	XAF1	PLK4	GON4L	PLOD2
	PTGER4	MAD2L1				SYT11	PCDH9	IL16	RPL34	PTN	IGSF3	IFI35	CCNE2	SF1	RPS28
	NDNF	PTTG1				PLOD3	COL9A3	BST2	RPL15	ITGB1	HP1BP3	NLRC5	FANCD2	MCOLN3	RNASE1
	NR2F1	SKA3				HSP90AA1	DCBLD2	SLC9A3	RPS5	H3F3B	GPR37	VAMP5	DEPDC1	RGS12	PLOD1
	BGN	PLK1				MLANA	CHST6	CAV1	RPL11	TPM2	LGI4	CTSS	DIAPH3	ERICH1	SLC7A5
	TGM2	BUB1				PHACTR1	CADM1	PRELP	RPL37A	TIMP1	GLG1	DTX3L	CENPU	SLC25A37	XIST
	TMSB4X	CDK1				PLAT	HSP90B1	DDX3Y	RPS28	TMEM47	ADGRG1	PSME1	TOP2A	INTS6	TRIB2
		ESCO2				PDGFA	SEMA3B	FAM69C	FAU	PRRX1	DCT	SAMD9L	KIF15	HMCN1	FAM162A
		UBE2C				ENDOD1	TGFBI	SAMD9L	RPL28	PTMA	TRIM2	TNFSF13B	FANCI	IGF2BP2	NDRG1
		AURKB				MYO10	DAG1	TYRP1	RPS16	C1S	MTRNR2L8	LAP3	UBE2C	KANSL1	WSB1
		KIF18B				GULP1	TIMP1	C10orf90	RPL39	COL18A1	ATRX	PSME2	KIF2C	MYO5A	ANKRD37
		TUBB				GPR155	CDCP1	CST3	RPL7	TUBA1A	LPL	RSAD2	FBXO43	LUC7L3	KDM3A
		CENPW				MT-ND4L	TIMP3	CAVIN1	BTF3	TPM1	ITM2B	EPSTI1	PCLAF	MAML2	RNF24
		KIFC1				SDCBP	PRNP	WDR63	RPSA	IGFBP2	GPNMB	ZNFX1	KIF18B	WSB1	PRR34-AS1
						ETV5	MICALL2	PML	RPS27	AHNAK	TEAD1	BTN3A1	E2F7	SLC16A1-AS1	BNIP3
						FIGN	EMILIN1	C9orf3	RPLP0	CCDC80	CTNNB1	PARP12	WDR76	LYST	EFR3B
						SYNGR1	PDIA4	QPCT	RPL13	TMSB10	ATP1A1	NMI	TACC3	PAX3	ST13
						RHOB	PPFIBP1	DSTYK	ATP5MC2	MMP2	KIF13A	BIRC3	MND1	HSPA1A	RPL22
						SLC23A2	COL15A1	MT1G	RPL31	IGFBP4	CHL1	PDLIM4	CKAP2L	CALD1	ZDBF2
						NES	CREB5	IFIT2	RPL21	CD9	CLIC4	OAS1	ASPM	RBM25	HK2
						CSRP1	IGFBP5	MAPK8IP2	RPL23A	PGRMC1	CCDC50	IFI6	BUB1B	FMN1	FKBP9
						PMEL	FN1	PERP	UBA52	NR2F2	SLC44A1	C1R	KIF11	IFI44L	SLC6A8
						DUSP6	PDIA6	SOD1	ZFAS1	TPM4	ALDOC	CASP1	CENPM	CCNL2	FXYD3
						HMG20B	ITGA1	LY6E-DT	RPS25	CNN3	ENAH	TNC	CENPK	OGFR	CFDP1
						MARCKSL1	CDH2	OAS3	RPS12	S100A4	PLAT	BST2	BLM	MTRNR2L8	LEPROTL1
						SDC3	SPARC	ATP6V0E2	RPS21	LAMB1	FRMD6	IFITM1	SHCBP1	SORBS2	SRRM1
						TOMM20	RAB31	CYB561A3	EEF1A1	EMP2	FADS2	IFI44L	RAD54L	ILF3	PLCG2
						ASAH1	PDIA3	SP110	RPL36A	HMGB1	PLCG2	SAMHD1	IQGAP3		WDR45B
						CNP	PLEC	EMP3	RPL4	GSN	APOC1	BTN3A2	ZWINT		RPL36
						PUF60	COL18A1	SLC25A4	RPL22	CTHRC1	TSC22D1	TMEM140	LMNB1		BHLHE41
						HACD3	SEMA3A	RPS4Y1	EIF3H	TGFBR2	SESN3	DDX60	PRC1		ALDOA
						SDHC	AMOTL1	EZR	EIF3E	TNFRSF12A	ZFHX3	BTN3A3	SKA1		AMD1
						MATN2	COL1A2	PLXNC1	PFDN5	FGFR1	ROBO1	IRF7	CDCA3		RLF
						FAM210B	HYOU1	CTSH	TPT1	S100A6	BICD1	GSDMD	BRIP1		DDX18
						ISYNA1	PLAT	SLCO4A1	EEF1B2	IFITM2	ITGAV	OAS3	DLGAP5		ZMYND8
						HSPE1	TANC2	COPZ2	RPL27	LGALS1	SYT11	TRIM69	BIRC5		HIST1H4C
						CSPG4	PDGFA	VEPH1	RPL26	VCL	ETV1	FRMD4A	ZNF367		NOL3
						NDUFA4	SDC3	SORBS2	UQCRH	LAMC1	PIGM	A2M	OIP5		CITED1
						CD320	DPY19L1	ACSL1	SLC25A3	TGFBI	FCRLA	IFITM3	KIF14		A2M
						SLC3A2	FAM3C	VAMP5	EIF3F	MGP	PRKDC	TRIM56	MYBL1		UPP1
						ATP6V0B	CD109	SYNM	RPL36AL	PTMS	PFKFB2	RTP4	CDCA2		NQO1
						TSC22D4	ALDH1A3	CTSB	NPM1	ANXA2	CDH19	CTSO	CDCA8		TUT4
						HSPD1	JAG1	CAV2	RPS26	ANXA1	TBL1XR1	STAT2	CDC45		FXR1
						NDUFB9	PLAUR	CSPG4	COX7C	LAPTM4A	SOX4	IFIT3	CHAF1A		TRIM2
						FBXO7	RUNX1	SAP25	FTH1	GNG11	AC009041.2	SP100	BRCA2		DDX41
						SLC25A4	COL6A2	RSAD2	RPL17	ITM2B	AP1S2	IFI16	TPX2		SARAF
						MITF	SKI	SPATS2L	UQCRB	TIMP3	SORT1	NAMPT	GTSE1		ZRANB2
						MT-CO2	COL6A1	CYCS	EEF2	LHFPL6	SPRY1	OAS2	GINS2		BRD2
						UHMK1	SEC24D	NEO1	EIF3K	H3F3A	PTPN13	APOL2	HELLS		FXYD1
						SOX4	TNFRSF12A	LGALS3BP	PABPC1	FERMT2	LMO4	CD47	KIF4A		HIST1H2AC
						STARD13	SH3PXD2A	ANXA2	HNRNPA1	DEK	UBL3	CLEC2B	TRIP13		TF
						POLR2F	SCARB2	HTRA1	COX5A	FSTL1	TNFRSF21	CAPG	ATAD2		TMSB10
						SARAF	APLP2	IRF7	SLC25A5	ARGLU1	KCTD12	HERC6	NCAPG2		IRF2BP2
						HSPA12A	RTN4	BMP2K	YBX1	RAP1B	CC2D1A	HELZ2	BARD1		SLC5A3
						COMT	PLOD2	CISD1	TXN	UTRN	GPRC5B	NUB1	XRCC2		TNRC6B
						GPNMB	ECM1	GJB1	FTL	MYL9	NMT1	MIA	UBE2T		INTU
						SYPL1	CREB3L2	CSTB	RPL38	CAVIN1	BCAN	GPR155	KNTC1		P4HB
						PHLDA1	ITGA2	ANKRD9	CLTA	NDRG2	IGSF8	S100A10	SPAG5		RNF19A
						PPIA	AKAP6	GPX3	SLC25A6	ZFP36L2	PRCP	DDX58	CDT1		DYNC1I2
						C1orf43	SHC1	ATP5PF	TOMM7	PPIB	ALDH1A1	FAM111A	DSCC1		ZNF292
						MXI1	ASPH	S100A10	HINT1	UBC	ELOVL2	C1S	MAD2L1		SEC61G
						KMT2E	HSPA5	DOCK5	CHCHD6	PNRC1	PTPRG	OPTN	ORC6		C2orf49
						MAGED2	SMURF2	DDX60	NSG1	FAM133B	SORL1	RNF213	MNS1		TNFRSF14
						GPR137B	DDX5	APBA2	EPB41L4A-AS1	QKI	F2R	MX1	PIMREG		ABCA1
						PCDH7	CHPF	PARP9	RPL27A	PRNP	TXNIP	USP18	CENPW		TCEA1
						RPS7	COL16A1	BAALC	CHCHD2	NFIB	SAMMSON	NFKBIA	C21orf58		PRPF4B
						APP	BACH1	CD99	COX5B	AKAP13	CEP85L	SP110	FBXO5		SARS
						ATP6V1G1	WWTR1	MAP2	RPL13A	RUNX1	PKD2	SAMD9	MCM2		NBL1
						C1orf21	GALNT2	CIB1	LDHB	RHOB	PTPRJ	SNX10	RECQL4		BIRC7
						PCBP1	DST	SEMA3C	SNHG7	MATN2	LSAMP	KLF4	DHFR		AKAP12
						MT-ND5	TRAM2	HELZ2	TRMT112	PRSS23	CCDC80	IFI44	RFC3		PEG10
						SPTBN1	MMP16	ATP5MD	PHB2	MAP1B	OPN3	WIPF1	GINS1		C1S
						LSAMP	SSR1	PLSCR1	HIGD2A	COL9A3	CHML	PML	CDKN3		TENT5A
						MYO5A	S100A16	PDE4B	TUBB4A	CYBRD1	ATP1B1	OGFR	DEPDC1B		ZFP36L1
						MT-ATP8	ADAM17	MT2A	IGBP1	PHACTR2	CPQ	EIF2AK2	ARHGAP11A		TRA2A
						ATP5MF	PGM2L1	GNAI1	METTL9	JAG1	HMCN1	TSC22D3	RACGAP1		ATF4
						PRMT2	PPP1R18	FMC1	EIF3G	PLPP1	HES1	SPATA13	POC1A		NR2F1
						CCT6A	GOLIM4	IFI27L1	RGS20	TAGLN2	HSPA1B	MT1M	FANCB		COX20
						FDFT1	CALR	S100A4	ALKBH7	LIMA1	EDNRB	CST3	TTK		SHMT2
						APOC1	REEP3	HMG20B	RSL1D1	SPRY1	HSPA1A	FOSB	CENPA		SEZ6L2
						TRIM2	SGCE	PODXL2	SAT1	STARD13		NFKBIZ	GINS4		ATP5ME
						RPN2	SEC31A	RPLP1	MLANA	SH3PXD2A		CEBPB	FANCA		C8orf33
						UBL3	DNAJC10	AGRN	CHCHD10	MPZ		PLSCR1	MCM4		FCGR2A
						TROVE2	ENC1	HEXA	IMPDH2	ENG		TYMP	CENPH		ARRDC3
						CHL1	EHBP1	IL6R	POLR1D	SH3BP5		CADM1	TIMELESS		PLXNB2
						ZC3H13	KDELR2	SCIN	GSTP1	RGS16		RGS1	CCNB2		PRAME
						APOE	EDEM3	CFH	SNHG8	BZW1		MX2	CDC25A		N4BP2L2
						MRPS18B	LTBP3	HERC5	RPS29	CTGF		C19orf66	BRCA1		SPRY1
						SMS	ACVR1	ENPP2	ESRP1	MDK		CDH19	HMGB2		RPS29
						METRN	LAMC1	CCND3	RPL22L1	UACA		ADAR	GMNN		AP2B1
						CCT3	PTPRZ1	KAZN	TKT	SPTBN1		CAMK2N1	BUB1		CCDC80
						EMP3	SELENON	MFSD12	ACTG1	LIMS1		SOD2	CIT		IGFBP2
						DSTYK	NUCB2	SLC6A6	NDUFAB1	PMP22		TRIM38	MASTL		PHPT1
						CTNNB1	CLTC	UBE2L6	ATP5F1D	TNC		MCL1	DONSON		AKAP9
						BTG1	PKM	EIF2AK2	VDAC2	LRP1		LDLRAD3	RAD54B		EIF1
						CEP170	ATP2B1	MFGE8	COMMD6	SERPING1		JUNB	MCM7		HSP90B1
						NDRG2	AKAP13	VPS28	RAB38	LTBP4		KLF9	EZH2		OTUD6B-AS1
						RCN2	SH2B3	RCN2	NME2	ATP2B1		SRGN	NEK2		MTRNR2L1
						NAA20	FCRLA	SPECC1	ATP5MC3	SOX4		C19orf12	CDC20		NFE2L2
						ARPC1B	TMEM87B	SMIM19	CCT3	TXNIP		S100A6	CIP2A		SCD
						MIF	GAS7	AKT1	ATP5F1C	ITM2C		STARD13	POLE		S100A6
						NDUFS2	XIST	RGS10	AHCY	HSPG2		AC016831.5	ATAD5		KLHL24
						CDKN2A	ROBO3	FGFBP2	RPS17	RNF24		MT2A	RRM1		DDIT3
						PFDN2	ATP2B4	LAP3	ATP5F1B	SSFA2		RGS16	FEN1		SERPINB1
						NUDT4	CTSZ	MORF4L1	PIR	CEBPD		BCAP29	MCM5		P4HA2
						FARP2	GLG1	RETSAT	PEBP1	FOXP1		ATF3	SMC4		CDH19
						BSG	ARF4	COL4A2	SELENOH	HDGF		CTSZ	PSMC3IP		DNAJB4
						ALDH1A3	HIVEP3	BCL2A1	FDFT1	S100A10		EGR3	CHEK1		SQSTM1
						CD44	TGOLN2	SORBS1	RPL23	HIF1A		NFIX	TYMS		AEBP1
						SAT1	TMEM178B	IFITM1	RAN	BAZ1B		TAGLN2	NSD2		HES1
						ZEB2	DNAJC3	BSG	GAPDHS	CST3		GAS7	MCM3		PLIN2
						NAXE	CEP97	TP53TG1	DNPH1	KCTD12		APOD	HAUS8		NRN1
						DLC1	MACF1	POLR2L	SDCBP	NCOA7		AHR	DSN1		FSTL1
						DST	TMEM132A	MT1E	ATP6V0C	UBL5		IFIT1	ZGRF1		LGI4
						SLC25A5	CNN3	PKM	MIF	CSRP1		HERC5	CHAF1B		CHD1L
						RCAN1	P3H1	RUNX3	RPS20	TOP1		PHACTR4	PCNA		EGFL7
						PRNP	GALNT7	ATP5MPL	GABARAP	GNAS		BAALC	MXD3		AHNAK
						ST3GAL5	FLNA	FAM89A	VIM	FXYD1		SRGAP2C	CENPE		TXNRD1
						SFRP1	B4GALT6	GSN	RPS4Y1			NR4A2	TMPO		UGP2
						CUTA	TAOK1	RPS12	SCIN			MTUS1	MCM6		DCT
						TECR	EIF4G2	LINGO1	RPS10			ADAMTS1	RFC2		SLC7A8
						PABPC1	NXPE3	S100A1	ALDOA			JUN	USP1		SERPINH1
						CCDC50	EFS	PARP10	HPGD			XRN1	HMMR
						LONP2	MAP4	IFITM3	CRTAC1			ANXA1	ECT2
						RDX	SPTBN1	IGF1R				CAVIN3	TONSL
						LDHB	SLC16A3	PRDX2				LGALS3BP	KIF23
						SPRY2	SLC5A3	YBEY				PTGDS	RMI2
						CBR1	C1R	SLFN5				RCN1	NRM
						ANKRD10	ADAM23	HACD3				PGM2L1	MCM8
						ATP5MC2	ANXA1	CDC42EP3				CD9	RFC4
						CD59	XBP1	TOM1L2				REL	CENPF
						GABPB1-AS1	VCAN	C4orf48				FGFBP2	SGO2
						HSPB1	GNB1	MYO5A				RCAN1	PRR11
						SNHG7	TAPBP	TPD52				PDIA3	STIL
						BACE2	CANX	RPS17				IFITM2	MMS22L
						ZMYM2	BZW1	MT1F				SLFN5	CCDC34
						GAS7	PLXNA3	HLA-E				MAP1B	CDCA4
						ATP1B3	DDX17	RBM3				FBXO32	DNAJC9
						CLIC4	WIPF1	TRAPPC6A				DAAM2	C1orf112
						DAG1	SYT11	COX5A				MMP16	KIF20B
						ABL2	S100A4	CYGB				NFATC2	TUBB
						MTRNR2L12	NCAM1	COL6A1				RDX	DNMT1
						PEBP1	CBFB	C11orf24				ITPRIPL2	GGH
						TSC22D1	EHD2	SLC18B1				FOS	LRR1
						CD9	NES	TOMM7				MPZ	DUT
						DDX17	ZCCHC24	ARL2				AC020916.1	VRK1
						S100A10	SH3GLB1	TMED3				DUSP1	FANCG
						TAGLN2	ZBTB38	TPCN2				GADD45B	LIG1
						ABHD2	HLA-C	C11orf96				ZC3HAV1	CENPN
						CCND1	P4HA2	MTHFD1L				JUND	AURKA
						EMP2	SLC38A10	NPTN				DDX60L	ZWILCH
						SLC25A37	PLEKHA4	CELF2				NUPR1	RFC5
						IFI6	RBMS1	HPGD				CTSD	RBBP8
						PLCG2	CLSTN1	GAPDHS				TACC1	WDHD1
						PMP22	37500	TMBIM4				SLC26A2	SMC2
						VEGFA	SCRG1	COTL1				FXYD5	HIST1H2AH
						TNFRSF12A	MAGEC2	PARP14				IER2	POLD3
						IFI27	ZNF827	MYL12A				EGR1	SASS6
						ANXA1	S100A6	KANK1				ICAM1	RPL39L
							PTP4A2	CTSD				ADD3	CENPS
							HSPG2	ATP5PO				S100B	CKAP2
							ZDHHC20	UBE2Q2				NOV	DEK
							CAVIN3	IFIH1				IGFBP4	CENPQ
							SDF4	CALM1				KHDRBS3	NEMP1
							S1PR2	SNX9				PPFIBP1	KIF22
							PLOD1	FABP7				SELENOM	NCAPH2
							AAK1	ANKS1A				BANCR	HMGB1
							CD9	EHD4				CNP	TTF2
							PIEZO1	PDLIM2				SPARCL1	LMNB2
							TTL	DPP8				TUBA1A	NCAPD3
							FRMD8	IFNGR2				RND3	CDCA7L
							LAMA4	IFI27L2				TYR	TUBG1
							UGGT1	SERPINE2				SERPINE2	CCNB1
							SORCS1	MRPL23				IER3	CHTF18
							CLIC4	CTNNA1				AEBP1	DTYMK
							ENDOD1	COX6C				FCRLA	PLK1
							RCN3	B2M				CEBPD	PRIM1
							C6orf62	IQGAP1				SFRP1	NCAPD2
							SRPX	GTF2A2				FKBP11	RPA3
							SPCS3	BRI3				VMP1	CCDC18
							GNAI2	PMP22				TIMP3	POLA2
							PSMD1	SEC11A				RBM25	TEDC2
							GFPT1	NDUFB1				FXYD3	DHTKD1
							TRAM1	MAP3K3					MDC1
							TPM4	RHEB					CEP152
							SRGAP2	MMP17					UBR7
							GULP1	SLC24A5					CENPL
							TUSC3	PIGP					RBL1
							HLA-B	BACE2					CCNF
							ITGB5	SHISA5					CKS1B
							VMP1	COMMD4					POLD1
							HLA-A	NDUFB8					ASRGL1
							SEC61A1	CKB					TUBA1B
							HSPA13	CD81					WDR34
							ABL2	NINJ1					NUDT1
							IQGAP1	MBP					CEP78
							UBR4	ITPKB					NASP
							RPN2	DTX3L					CSE1L
							SIPA1L2	CD276					FIGNL1
							NRP2	LSM3					SAE1
							ITIH6	POSTN					H2AFZ
							CTSB	ETFA					CCNE1
							FRMD4A	CRTAC1					HSPB11
							NUFIP2	SNCA					ICMT
							CEP350	PPM1K					RPA1
							TMEM47	CRYAB					WEE1
							AEBP1	ADI1					HMGN2
							DHCR24	SLC4A2					SPDL1
							GPR155	RPS27L					NUCKS1
							CDH19	S100A6					MIS18BP1
							EMC1	NDUFS6					RFWD3
							FAM78B	RNF130					TMEM97
							ARHGAP5	CHMP1B					PAQR4
							EXTL2	ETFB					KPNB1
							LASP1	RAB32					HMGB3
							SHROOM4	ESYT2					POLA1
							KIAA1755	LRRC75A					ZNF519
							SH3KBP1	CD44					STMN1
							STT3A	MT1X					CARHSP1
							SHC4	PSMA4					KPNA2
							KDELC2	DPYSL2					ALYREF
							KDELR3	PLEC					LRRCC1
							CD151	ATOX1					H2AFX
							PURB	SGCD					NT5DC2
							WLS	ANXA4					CENPJ
							AFAP1L2	MSRB2					H2AFV
							ABHD2	OSTM1					TOPBP1
							LRP12	INPP4B					CDKN2C
							STARD13	SPPL3					PSIP1
							PLCG2	LOXL3					TEX30
							ACAP3	ANXA1					THOP1
							LGALS3BP	BMPR2					RPA2
							STK17A	PLP2					DBF4
							ELK3	MYH10					MIS18A
							DYNLT3	RAB27A					CKLF
							LPP	EMP1					RAD21
							TMEM30A	TMEM106C					SKA2
							TOR1AIP2	MTUS1					MAD2L2
							FHOD1	P2RX7					PTMA
							DDR1	TRPM1					COQ2
							UBXN4	STAT1					RANBP1
							TANC1	S100B					PHF19
							CAVIN1	CSRP1					MPHOSPH9
							HOMER1	PRSS23					SMC1A
							MCL1						CKS2
							NFIC						NDC1
							RDX						CALM2
							ADARB1						BRI3BP
							SLC22A17						NUP205
							HDLBP						UNG
							PLXNB2						RNASEH2A
							EPRS						CCP110
							FLNB						CDCA7
							YWHAG						FN3KRP
							BAZ1B						RHNO1
							ROCK2						PXMP2
							IMPAD1						SAC3D1
							SH3BP5						HIRIP3
							APP						GGCT
							LMAN1						PRIM2
							MAGT1						PIGX
							SPATA13						PSRC1
							VWA1						SLF1
							PITPNB						HIST2H2AC
							CPD						GMPS
							CDK6						ACAT2
							PHLDA2						HADH
							ZFHX3						DDX11
							PSAP						IDH2
							DYNC1I2						HIST1H4C
							KATNAL1						LSM4
							MSL1						EXOSC9
							EXT2						DHCR24
							IFI44						BUB3
							NORAD						DDX39A
							PAM						TFDP1
							NFE2L3						DIAPH1
							TFAP2C						MSH2
							SCRN1						SLC25A40
							MICA						CCDC167
							SLC17A5						EXOSC8
							GRB10						TCOF1
							VGLL4						CBX5
							RNF19A						POLE3
							GLB1L						HIST1H1E
							CD276						CTPS1
							MEF2C						C3orf14
							PPP1CB						TMEM106C
							MESD						HAUS1
							VRK2						BTG3
							ACTR2						MYO19
							UBE2Z						RNASEH2B
							USP34						CD83
							STT3B						SNRPG
							ADGRG6						LMF2
							CHD9						PCNT
							EMP1						GEN1
							VEGFA						SRSF10
							PLPP1						HNRNPAB
							SMC4						PRKDC
							PRRX1						CEP295
							IFI6						SMC3
							TMX4						MAP3K20
							NID1						ARL6IP6
							RNF213						CSTF3
							TNRC6B						SIVA1
							TGFBR2						RBBP4
							CEMIP2						SLC43A3
							SUN2						HAT1
							ACLY						PPIF
							POSTN						TMEM237
							RRBP1						BAZ1B
							FNDC3A						PGP
							PRICKLE2						GPSM2
							ESYT2						XPO1
							PJA2						CEP135
							MAP3K2						CNTLN
							SEMA3C						RAD1
							ADGRE5						HPF1
							ACTN1						TUBB4B
							SHTN1						CDKN2D
							TMEM45A						RECQL
							TUBB6						NUP85
							GABBR1						BCL2L12
							LRP1						SNRNP25
							TSC22D1						H2AFY
							HS2ST1						PARP1
							MAN2B2						SLBP
							RRAS						THEM6
							ARPC1B						ACYP1
							MARCKS						IPO9
							COPB1						LSM5
							PTPN14						RAD51C
							LAMP1						PTTG1
							FURIN						SRSF2
							PLOD3						POP7
							AGO3						OAS3
							TAGLN2						SUZ12
							BCAP29						CCDC14
							GPC1						CBFB
							AGRN						PPIH
							MYLK						YWHAH
							PAFAH1B2						ITGB3BP
							RHOC						HNRNPD
							SKIL						ANKRD9
							STAT1						CNOT9
							IGSF3						YEATS4
							HP1BP3						MZT1
							SURF4						PPM1G
							NUCB1						RCC2
							ARHGEF2						SNRPD1
							ITPR3						PHTF2
							CMTM3						GLO1
							FADS2						SAMD1
							MANF						RBBP7
							TRIP12						FOXRED2
							MIA						FANCL
							MFSD6						NUDT15
							TEX261						COMMD4
							YWHAZ						RFC1
							UHMK1						EBP
							ZRANB2						TUBB6
							TXLNA						PRADC1
							SACS						RCCD1
							AKAP11						PSMG3
							MAN1A2						USP37
							FZD6						ATP5MC1
							TIA1						SAP30
							ATP13A3						NFATC2IP
							ANKRD11						LSM3
							AGO2						FAF1
							ITPR2						TACC1
							CAP1						TPGS2
							NFAT5						SNRPB
							QSOX1						SUGP2
							EXTL1						SNRNP40
							SMPD1						PTBP1
							SLFN5						ATP1B3
							CEBPB						JPT2
							IDS						FAM111A
							ITGAV						SRRT
							GAA						MTHFD2
							COPA						GJC1
							LMF2						UBE2S
							SLC4A7						BOLA3
							UBA6						SRSF3
							CD82						ACTL6A
							TEAD1						RHEB
							AC245297.3						CBR3
							NF1						CASP2
							CYBRD1						IFI27L1
							FIGN						CEP97
							SPPL2A						MSH6
							LMO4						NUDT21
							PGM3						REEP4
							CKAP4						HNRNPA2B1
							CAPN2						E2F3
							TENT5A						DAXX
							ENPP2						HINT2
							ACSL3						SUMO2
							CDC42						MTHFD1
							ZC3HAV1						CALM1
							TRIM9						XRCC5
							PREPL						CISD2
							ZBTB20						RB1
							YAP1						IPO5
							AC005261.1						PPIA
							RASSF8						ANP32E
							NCKAP1						FH
							ZMPSTE24						UQCC2
							FKBP10						C19orf48
							PPM1M						UFD1
							SLC20A2						TSEN34
							EIF4G3						CASP8AP2
							ZMYM2						OAS2
							DYNLL2						AP2S1
							SRSF11						SYNE2
							MAP4K4						MRPL37
							PRKAR1A						MANF
							GANAB						HMGN1
							SEL1L						CMSS1
							NMT1						PAICS
							ASAP2						HIST1H1C
							SNRNP70						EMP2
							C1S						UCHL5
							MYO9B						COPS3
							AIDA						PEA15
							EIF4G1						AKR1B1
							MAPK6						NUP62
							PPIB						SNRPD3
							PRSS23						TPRKB
							PRCP						CDC27
							RECQL						NUCB2
							RBM5						PSMD1
							TRPS1						HDGFL3
							SGCB						TP53I13
							SSFA2						AKR7A2
							KPNB1						SRSF4
							RCN2						PLSCR1
							SERPINH1						CENPX
							LEF1						ATL3
							IQSEC1						CBX1
							FKBP14						CHRAC1
							BIRC6						HLTF
							GOLGA2						HERC6
							MYL9						SNRPA
							KMT2A						CTNNAL1
							RPN1						HEY1
							CSNK1E						TUBA1C
							GNG2						PA2G4
							NCOR2						KIF2A
							DLGAP4						ATP5MF
							CLASP1						DHX15
							CD58						NAA50
							JMJD1C						NFIC
							LPCAT2						CENPB
							UBA1						LSM2
							NAB1						COX17
							EMC10						FDPS
							BIRC2						ACOT7
							ELK4						SLC29A1
							PDLIM3						PGAM1
							CTSC						DBI
							PSMD14						MINOS1
							ARHGEF26						SRPK1
							SMG7						SUPT16H
							AC074117.1						PAXX
							PTGFRN						PSMC3
							ZNF148						CACYBP
							FRMD6						COPRS
							TUBB						PFN1
							PARP9						SSRP1
							NEDD9						SPCS3
							CGGBP1						AMOTL1
							ZBTB7A						ADAM15
							MMP15						ANAPC11
							MEF2A						ELAVL1
							CAMK2D						CMC2
							CCNL2						SRP9
							MMP14						UQCRQ
							CASC4						PTDSS1
							EHD1						THOC3
							MOXD1						GPR180
							AHNAK						ITGAE
							ROBO1						TUSC3
							CAPZA1						MRPS11
							SFT2D2						H1FX
							MYEF2						PKM
							DTX3L						IFI44
							PON2						CALU
							KPNA6						ANP32B
							FTX						TES
							ZFP36L2						EIF2AK2
							SLC39A7						ZFP91
							NPTN						VDAC3
							SPRED1						ECM1
							GLS						WLS
							RHOB						SLC25A5
							PEG10						HNRNPA3
							HIF1A						MCUR1
							ERLEC1						NDUFB2
							DNAJB11						POLR3K
							IFNAR1						POLD2
							LENG8						TPM4
							MBTPS1						CCT5
							PRKACB						RAD23A
							PLPP5						SNRPF
							USP53						ITGB3
							FXYD5						HINT1
							CTGF						EIF4EBP1
							ACER3						DTX3L
							WSB1						LRP12
							ARHGEF12						RAN
							BTBD3						TMEM14A
							EIF3J						FGD5-AS1
							TYMP						NDUFB1
							UGDH						PRKD3
							JUND						DCBLD2
							ITPRIPL2						UACA
							CLDND1						TMEM98
							CSPG4						RIF1
							NAV1						PARP9
							PACSIN2						HNRNPF
							PARP14						FABP5
							USP4						ERH
							MAGED1						CNN3
							SEC22B						NDUFA6
							GNAI3						IL1RAP
							ARFGAP3						MEA1
							DNMT1						DCTPP1
							APOD						ARPP19
							CYTOR						PTP4A2
							DLC1						ARL6IP1
							SLC43A3						ANK2
							SERINC5						KANK2
							ACOT7						JPT1
							TIMP2						TMX4
							UTRN						MOXD1
							PSD3						PHGDH
							UBXN2A						SMIM19
							PTP4A1						CTXND1
							SREBF2						MT2A
							MAF						ISG15
							SNX22						NBL1
							UVSSA						SNX10
							CCDC14						SLFN5
							TM9SF3						TLNRD1
							RCAN1						MYH10
							SRGN						PHLDA2
							A2M						CREB5
							LAMP2						PLXNC1
							WDR82						SDC3
							CNP						TEAD1
							PHLDB1						PLP2
							CCPG1						HMGA1
							RNASE1						FCRLA
							SPATA6						ABHD2
							TACC1						IFI44L
							CLCN3						PLAT
							FAM129A						LGALS3BP
							ATP1B3						TOMM5
							TMEM248						FSTL1
							DBNDD1						SCRG1
							MYDGF						STAT1
							LAMB1						THBS2
							CMTM6						FARP2
							TCF12						FMN1
							ANXA2						HSPA1B
							ABCA1						MX1
							FGD5-AS1						AEBP1
							MYH9
							S100A11
							TPM1
							CLEC11A
							GNAS
							PAQR8
							STX16
							CELF1
							RND3
							LSAMP
							CNIH3
							NUP58
							CUX1
							IFNGR2
							ZYX
							ZC3H13
							PDLIM5
							PARP4
							ANKRD10
							NEAT1
							QKI
							RBMS3
							IER3
							SEMA3D
							KIRREL1
							CC2D1A
							MCAM
							ST6GAL1
							FKBP9
							DNAJB9
							SDF2L1
							B2M
							MOB1A
							IFI44L
							CCND1
							P4HA1
							SQLE
							S100A10
							RCN1
							RGS16
							XAF1
							PCOLCE
							FSTL1
							XYLT1
							LGALS1
							DPYSL2
							LMNA
							SH3BGRL3
							SLC25A37
							MGP
							COL6A3
							LIMS1
							MRPS6
							ENO1
							GNG7
							S100B
							NDRG1
							IGFBP2

## Sheet: Supplementary Table 4
Gene	p_val	avg_log2FC
DRAM1	5.09155e-06	2.99979
DNAJB4	1.5139e-05	2.50263
PHLPP1	2.01842e-05	3.04701
HSPA6	2.35957e-05	3.7574
PLK2	2.63437e-05	2.82297
TRIO	5.65269e-05	2.6658
TMEM117	0.000126172	2.96595
DNAJA4	0.000162458	2.5308
PLXDC2	0.000163106	2.87163
TESK2	0.000204115	2.64092
PRDX1	0.000224315	1.41616
CHKA	0.000340677	2.58884
SPATS2	0.000361356	2.41945
PYGL	0.000438427	2.50089
ABHD17B	0.000521645	2.08758
STMN1	0.000525133	1.7515
BAG3	0.000550036	2.16154
RASSF4	0.000551474	2.36032
HPS4	0.000586782	2.63051
FHIT	0.000740737	2.56434
GZMM	0.000833297	-1.17152
HSPE1	0.000876765	1.41214
GPR15	0.000910347	2.92928
GRK3	0.001	2.72933
PTPRJ	0.00127166	1.83174
FXYD2	0.00149971	4.18553
MT2A	0.00156283	-1.20893
SIK2	0.00181593	1.85371
ZFAND2A	0.0018682	1.59346
OLFM2	0.00187799	-0.00465098
MTSS1	0.00189675	2.36786
ASXL1	0.00196536	1.30911
ARL13B	0.00202176	2.3061
FRMD4A	0.00207408	2.22844
FAM174B	0.00220686	2.36601
TRAV14DV4	0.00225679	-0.456832
ZC3H12C	0.00265217	2.18752
MRTFB	0.00268361	2.53395
MT-ND6	0.00278274	1.36697
IDNK	0.00280557	2.25324
HLA-DRB1	0.00304288	1.08511
SLC25A13	0.00310866	2.23781
SLC12A2	0.00325061	1.83391
ZMYND8	0.00335956	1.7945
SDCBP	0.0033709	1.24731
MET	0.00337957	2.1393
KLHL8	0.00367398	2.34404
OXNAD1	0.00370444	-0.806557
ZNF519	0.00379569	2.53877
NCKAP5L	0.00389586	2.08797
RTN3	0.0039711	1.46227
PIK3R4	0.0039759	2.63338
ALOX5AP	0.00423596	-0.940087
LEF1	0.00427548	-0.265293
TRAV1-2	0.004593	-0.269084
CTDSPL2	0.00478512	1.96432
CALHM2	0.00487522	-0.310182
UBN2	0.00502243	2.27092
GK	0.0051342	1.84516
QPRT	0.00528113	2.35887
ABCC1	0.00573092	1.75689
ANKRD37	0.00577006	1.19481
RHOQ	0.00579651	2.07021
RASAL3	0.00589888	-0.604105
SGCD	0.00622612	2.22559
ERO1B	0.00629441	1.28955
FAM126A	0.00630742	2.09161
MFSD4B	0.00651816	2.24804
GZMA	0.00653595	-0.780929
LY9	0.00689909	-0.449123
MTBP	0.00696769	2.40974
CYSTM1	0.00699488	1.83714
EYA3	0.00716999	2.15885
CDIN1	0.00734339	2.29221
SCD5	0.00757922	2.2564
OCIAD2	0.00766157	-0.453591
DDX5	0.00775432	-0.623512
ARID5B	0.0078858	1.59707
STAM	0.00791045	1.88348
TRBV14	0.00799423	-0.6866
RHBDD1	0.00814139	2.00146
PDE4D	0.00841177	1.43701
PRKAR2B	0.00851689	2.33353
SERPINH1	0.00860572	2.59247
HNRNPLL	0.00865777	1.12202
RSL1D1	0.008916	1.29158
GRK6	0.00892864	-0.594793
FABP5	0.0090944	1.12409
MAP2K4	0.00928075	1.69788
CXCR3	0.00940181	-0.807322
FRS2	0.00948875	2.01543
GIMAP1	0.00971516	-0.879274
UBAP2	0.00972881	2.08222
TRAV27	0.00973259	0.0107394
FAM174A	0.00978887	2.30615
ATP6V0E2	0.00990082	-0.378149
CAPG	0.0100045	-0.119279
TRBV30	0.0102425	2.0047
CD8B	0.0102489	-0.956019
WDFY1	0.0102521	2.29466
HEXB	0.0102995	2.08852
HSP90AB1	0.0104098	1.11326
TRAV21	0.010762	-0.375029
BBC3	0.0107944	1.52563
RTTN	0.0107958	2.23756
NKRF	0.0109396	1.60315
DYNC1LI2	0.0112472	1.72788
CD52	0.0112854	-0.869994
LYRM4	0.0113797	2.06715
DISC1	0.0117364	2.13372
TRAV13-1	0.0117704	-0.0390204
PRDM4	0.0117884	2.05077
HSP90AA1	0.0120179	1.2289
GPR171	0.012238	-0.329802
SNX24	0.0122533	2.2476
ADAT2	0.0123126	2.05876
NDUFS4	0.0124228	2.14399
SORBS1	0.0124841	1.93406
FKBP4	0.012589	1.57051
DNAL1	0.0128408	2.39458
MYLIP	0.0129113	0.956584
TARP	0.0129815	2.42205
IDE	0.0131358	2.10399
AHSA1	0.0131603	1.23328
SLCO3A1	0.0135356	0.0258723
SH2D3A	0.0135711	-0.226981
OSBPL1A	0.0139266	2.03554
ST7	0.0139382	2.21411
RGPD8	0.014047	0.285125
C4orf33	0.0142881	2.11325
NARF	0.014563	1.73964
TYRP1	0.0147763	1.90999
PLAC8	0.0148847	-0.0391145
HLA-DQA2	0.0149983	-0.923967
HSPB1	0.0150314	1.77126
PZP	0.0152033	-0.248194
LAX1	0.0153156	-0.559918
ELOVL5	0.0157352	0.780302
NCF1	0.0157739	-0.476412
ATP2A3	0.0158481	-0.207594
WDR1	0.0160342	-0.477296
UBR5	0.0160714	1.4813
MYO1F	0.0162962	-0.553003
MINDY3	0.0163572	2.09011
CPEB2	0.0167096	2.20913
ERP29	0.0169703	-0.578976
RASSF7	0.0169957	-0.308093
ZNF121	0.0171348	2.11131
MAP1LC3B	0.0171859	0.722006
RPP21	0.0173015	1.12413
ASTN2	0.0175203	2.35076
RABL6	0.0176513	1.78311
DNAJB6	0.0176841	0.87532
PRMT3	0.0177363	1.86858
NFIL3	0.0178384	1.25632
CD99	0.0180124	-0.549296
PLEKHF2	0.0180519	1.79538
IGF1R	0.0182338	1.99223
STRN3	0.0183721	1.53682
TPST1	0.0185436	2.20452
VEZT	0.0186603	1.31377
DNAAF9	0.018881	2.05193
IL18R1	0.0190165	0.237052
FARP2	0.0190901	2.18
NOP10	0.0191015	-0.587047
IL2RG	0.0192527	-0.671707
RPA2	0.0192776	-0.261118
VMP1	0.0196906	1.21011
TRBV12-3	0.0197105	-1.41386
MAN2A2	0.01978	1.97871
FAM102A	0.0198296	-0.741361
B3GALT4	0.0199476	0.0186941
MAPKAPK2	0.0202002	1.41842
TRBV12-4	0.0203614	-0.862602
HECTD4	0.0205135	1.42947
RIN3	0.0205623	1.62875
AIG1	0.0206089	2.27024
LEPR	0.0207109	2.38964
RHOA	0.0208756	-0.583272
CD8A	0.0209109	-0.764096
PATL2	0.0209289	-0.755192
SOX6	0.0210048	1.97569
CDKAL1	0.0210978	1.49542
DPP4	0.0215014	0.177123
ATP6V1A	0.0215849	2.15756
TNFSF9	0.0216158	1.14469
SOX4	0.0216324	1.81992
RNPEPL1	0.0219351	-0.402204
RAB21	0.0220575	1.14605
MRPL18	0.0223301	1.16969
SPIDR	0.0223358	1.30962
BAZ2B	0.0223765	1.74015
ATP10A	0.0223864	2.11998
TRIM26	0.022438	1.38052
RNF145	0.0224891	1.67106
SIPA1	0.0225011	-0.362793
TRAV4	0.022504	-0.0096297
HLA-A	0.0228143	-0.566338
YPEL1	0.0229516	0.0554817
MXI1	0.0230125	2.06312
BNC2	0.0233052	1.8331
HDAC5	0.0233305	2.11745
TES	0.0233529	-0.548701
LIME1	0.0233604	-0.66954
TRAF4	0.0233767	1.54215
PAPSS1	0.023409	1.82737
RGS14	0.0236238	-0.271761
GTF2F2	0.0237521	1.80147
VAPA	0.0238332	1.16064
ULBP2	0.0241364	1.80016
STN1	0.0242357	-0.220786
SIAH1	0.024311	1.97364
TTC16	0.0244086	0.26679
TENT5A	0.0244306	1.78635
TMEM203	0.0246491	-0.0732021
TULP4	0.0246766	1.53738
GNG11	0.0247422	1.93877
DYNC1H1	0.0247592	1.03633
PCDH7	0.0249508	1.78109
CTNNAL1	0.0249573	1.69314
MTHFD1	0.0250294	1.95492
ADNP	0.0252658	1.30968
CD84	0.0253857	-0.655595
ENSG00000280649	0.0255223	-0.539627
IKBIP	0.025818	1.8037
TTPAL	0.025855	2.14601
OFD1	0.026099	-0.757979
CAPZA1	0.0261056	1.14592
PDGFD	0.0261141	2.52677
SHISA5	0.0261493	-0.41702
RHEB	0.0263715	1.31482
FTO	0.0263749	1.66896
ICAM2	0.026396	-0.447497
GAB3	0.0264131	-0.0415195
NFAT5	0.0266137	0.871716
BIN1	0.0266244	-0.314714
ARL17A	0.0267446	1.98419
CASTOR2	0.0268036	1.78188
ATP2A2	0.0269236	1.62232
NF1	0.027205	1.2604
RUNX2	0.0273019	1.74046
PRKRIP1	0.0273484	1.60206
EPS8	0.0278284	1.76688
DDX49	0.0280416	1.90402
GALNT6	0.0280887	-0.228521
GNS	0.0283485	2.05761
TOP3A	0.0284313	1.99704
RUFY3	0.0284443	1.57381
ADGRG1	0.0284839	1.64713
PGAP2	0.028529	2.12994
TET3	0.0289804	1.82798
FBXW5	0.0290132	-0.47559
SELPLG	0.0290201	-0.615146
TRAV38-1	0.0290824	0.115468
PLXDC1	0.0293105	0.0857929
MED21	0.0296139	1.31547
GLIPR2	0.0296238	-0.459737
CD2AP	0.0298171	1.56766
ABCF1	0.0298461	1.11625
YWHAE	0.029868	1.43113
TRBC2	0.0300227	-0.49412
EXOC4	0.0301065	1.36082
SQSTM1	0.0301234	0.892537
HCST	0.0302583	-0.568049
NUDC	0.030382	1.0063
FRYL	0.0304749	1.08195
ZMYM2	0.0305656	0.875018
MYL12B	0.0306646	-0.59083
RPL17	0.0310663	0.857184
R3HCC1L	0.0310866	1.66839
RNF125	0.0311577	-0.207386
ERI3	0.0311722	2.01851
PGM2L1	0.0314764	1.85665
SCAPER	0.0314807	1.42293
ZRANB1	0.0317173	1.87648
LCK	0.0317465	-0.578854
H1-4	0.0320198	1.69807
LAIR1	0.0320403	0.154634
ABI2	0.0320751	1.84559
ESRRA	0.0321554	1.96184
MAST4	0.032183	1.80614
AHCYL2	0.032283	2.05055
RALGPS1	0.0323141	2.14939
PMAIP1	0.0323349	1.19151
RPH3AL	0.03259	2.25887
SLC35F5	0.032651	1.74867
ACTB	0.0329499	-0.694359
FER	0.0329886	2.84727
TSC22D1	0.0330335	1.59393
ANK3	0.0331774	-0.496458
TSTD1	0.0332042	-0.350032
FAN1	0.0332477	2.32081
MRPL37	0.0334825	2.15002
CCR7	0.0336699	-0.3696
MT1F	0.0337326	-0.452688
TRBV19	0.0337436	-1.68266
CCT2	0.03391	0.952185
ENSG00000279602	0.0339226	-0.65423
CD96	0.0340162	-0.487494
XRCC4	0.0340881	1.85329
SLC25A36	0.0342844	1.42824
EXT1	0.034648	1.9126
BBS4	0.0347036	2.07377
PARP1	0.0348557	-0.301778
MCTP2	0.0349359	1.43762
WARS2	0.0349424	1.53355
S1PR5	0.0350129	0.377741
SMAD3	0.0351527	-0.570187
TCF7	0.0352325	-0.357816
ZNFX1	0.035377	-0.534253
CSNK2A1	0.0355681	1.68026
CCDC191	0.0356221	2.05215
BRCA1	0.0358838	2.08221
ST13	0.0361883	1.31304
ADAM28	0.0363151	1.91711
PSIP1	0.03645	-0.512275
PLXNC1	0.0366379	1.89668
SLC7A8	0.0366852	1.90693
RAC2	0.0371763	-0.708006
MT-ATP8	0.0372927	0.789564
JUNB	0.0374947	-0.907635
TMEM33	0.0376707	1.87346
ABRACL	0.0377376	-0.684919
HSPD1	0.0378583	1.55933
ARMH3	0.0378845	1.53221
GTF2I	0.0379073	1.47035
CBR1	0.0381115	1.82289
SRPK1	0.0381464	1.47408
GZMK	0.0385356	-0.657724
NCL	0.0387461	0.595874
NLGN4Y	0.0387934	1.83295
CACYBP	0.0388788	1.071
ABCC5	0.0389703	2.18855
AHI1	0.0390679	1.13838
ZFP36L2	0.0393321	-0.621861
SARNP	0.0393869	1.59205
MATK	0.039434	-0.567497
HMBOX1	0.0398769	1.59704
PLP2	0.0399949	-0.922277
FBXO32	0.0400018	1.45482
HIBCH	0.0400651	1.29618
LYAR	0.040088	-0.358158
ANKS1A	0.0402264	1.58151
MS4A1	0.0402949	-0.209779
GPR89B	0.0407693	1.47294
RANBP3	0.0408178	1.72184
EZH2	0.0410763	1.44128
TOB2	0.0411066	1.13563
POLR3GL	0.041472	-0.40804
NUMB	0.0415124	1.50389
DNAJA1	0.0415608	0.913208
NR5A2	0.0417772	1.73447
CRYL1	0.0422079	2.15677
CNTLN	0.0422244	2.22282
BIN2	0.0422876	-0.437472
PRIM2	0.042467	1.79421
EGR2	0.0425204	1.36869
BCLAF3	0.0425451	2.01287
PTRH2	0.0425551	1.84771
HLA-B	0.0428562	-0.535634
PIP4P2	0.0429176	1.91024
NOM1	0.0431114	2.03709
JAML	0.0432064	-0.454047
ARID2	0.0433433	0.915118
CD3E	0.0433557	-0.604464
HLA-DRB5	0.0434738	-0.755575
SLC3A2	0.0437834	1.19796
ALDOA	0.0438952	0.851219
HLA-DQB1	0.0439293	1.07862
GIMAP2	0.0441622	-0.249816
TCIRG1	0.0443083	-0.552
TOPORS	0.0447388	1.17533
FOXO3B	0.0449271	1.97522
CDCA7	0.0449713	0.753097
ZRANB3	0.0451321	2.16822
UBE2K	0.045248	1.20495
ZNF717	0.0452549	2.64132
MYO9A	0.0452717	1.62524
POU3F1	0.0453883	1.6717
HSPH1	0.0454152	1.38487
TIMM10	0.0455176	1.72442
MAP1LC3A	0.0456117	1.4765
LARS1	0.0460672	1.72267
IKZF3	0.0462485	-0.434524
WDR70	0.0462842	1.54937
ARL3	0.046315	1.4406
RAC1	0.0463822	0.832013
CPNE8	0.0465165	1.75678
NUFIP2	0.0466266	0.863798
DCAF12	0.0466413	2.12872
PTK2	0.0470033	1.9217
SLC9A9	0.0474975	1.47328
CD7	0.0475357	-0.780535
UBASH3A	0.0477764	-0.432452
FXYD5	0.047853	-0.459542
GDF15	0.0479376	2.01807
GPKOW	0.0481137	0.1371
AARS1	0.0482702	1.58842
NR2C1	0.0483083	1.59369
RACK1	0.048766	-0.538891
KIAA0232	0.0487825	1.26563
BIRC6	0.04901	1.0453
RNF103	0.0491776	1.72158
HSPA4	0.0493558	1.31004
PDCD11	0.0494749	1.95814
CREB3L2	0.0494878	1.52274
MRPS9	0.049815	1.64841
KHSRP	0.049938	1.82703
ZNF235	0.0499672	1.80089
RTP4	0.0501147	0.186441
CKS2	0.0504364	1.173
FAM168B	0.0504903	1.68592
ALKBH1	0.0505172	1.71432
FRG1	0.050523	0.958201
TRAV1-1	0.0505777	0.28923
KIAA0825	0.0508266	1.57841
QKI	0.0510209	1.10564
UBE2L6	0.051083	-0.577202
WAC	0.0511279	0.926911
KLRC1	0.0512342	0.180503
MAGED1	0.051441	1.72626
KDM5B	0.0514497	1.20372
ACBD3	0.0515666	1.25176
TOM1L2	0.0517454	1.59161
KIAA1328	0.051845	1.69096
DAZAP2	0.0519227	-0.40692
DUSP4	0.0526074	0.99798
CTNNB1	0.0526227	1.31208
HCLS1	0.0530019	-0.44732
CHCHD6	0.0530625	1.66139
NLK	0.0530952	2.00754
GSDMD	0.0531019	-0.266336
PPDPF	0.0533589	-0.631397
ABL2	0.0537258	1.85293
CD46	0.0540832	1.01448
MCFD2	0.0541199	1.8301
MRFAP1	0.0546655	1.07665
ABCB1	0.0549407	-0.198043
ZNF683	0.0551004	-0.648792
C17orf80	0.0555649	2.09918
TRGV8	0.0556051	0.264816
GALK2	0.0559185	1.69194
CRTC3	0.0559473	1.72128
ZBTB6	0.0560202	1.87592
MORF4L2	0.0563469	0.947834
TIMM17B	0.0563534	-0.142599
SPINT2	0.0564637	0.254393
ZNF451	0.0565086	1.45315
HLA-DRA	0.0567706	1.04781
PIN4	0.0568076	1.46699
ARID4A	0.0568537	0.804514
PBX2	0.05694	1.69478
GRPEL2	0.0569595	2.10153
TRBV6-1	0.0569766	-0.176851
TPRG1L	0.0570072	1.74194
CHRAC1	0.0571071	1.23337
CDC42	0.0571497	1.07575
SATB1	0.057155	0.000816049
GPHN	0.0572616	1.45946
MNAT1	0.0574359	1.63557
HEXD	0.0576671	-0.0415305
NRIP1	0.0576675	1.58729
OS9	0.0578077	1.36117
RIC1	0.0578161	1.26017
NOPCHAP1	0.0578466	1.75303
UBE2V1	0.0580973	1.39032
PHTF1	0.058141	1.34984
PTPRM	0.0582698	1.75138
BRWD3	0.0583179	1.57523
RRBP1	0.0583702	1.57108
TNIP1	0.0583749	-0.450422
NINJ2	0.0584275	-0.0523449
PCGF3	0.0585751	1.73099
DGCR6L	0.0585874	-0.433011
RFX7	0.0585981	1.4515
ARHGAP35	0.058741	1.27296
ATP6V1B2	0.0587478	2.00908
FLNA	0.0588269	-0.568373
SNX8	0.058868	1.9402
POLR1F	0.0589466	1.2215
NHSL2	0.0591114	0.759245
LMBRD2	0.0592995	0.0255522
OPRM1	0.0593449	-0.100853
PRKACA	0.0595706	1.8054
TAPT1	0.0596696	1.79395
IGFBP7	0.0598137	1.56358
CACUL1	0.059943	1.5847
UAP1	0.0601098	1.48596
GNAO1	0.0601942	0.374929
FASTKD1	0.0602193	1.76132
ACO2	0.0602535	1.59607
SLC25A3	0.0602943	0.784968
ICAM3	0.0606381	-0.346138
OAS1	0.0607561	-0.433141
THAP11	0.0607685	-0.356108
NUDT22	0.0607847	-0.40314
TNFRSF10A	0.0610091	0.0586392
UCP2	0.0610821	-0.754779
THYN1	0.0611114	-0.29793
KHDC1	0.0611896	2.18639
NAV2	0.0612881	2.07622
EEF1A1	0.0613882	-0.485417
SLC25A40	0.0614733	1.85008
COPA	0.0615391	1.08705
CYBA	0.0615723	-0.518207
ZNF276	0.0616482	-0.180479
TXNIP	0.0618371	-0.689639
ZFAND3	0.0619244	1.18014
BRD2	0.0619887	0.794311
LAPTM5	0.0620383	-0.521334
BMP2K	0.0620433	1.96382
TOLLIP	0.0620594	1.83451
ING2	0.0623184	1.8036
CLIC3	0.0624248	-0.207094
PKD2	0.0624341	1.96287
MRPL45	0.0624742	2.03448
SIN3B	0.0626331	1.71441
CHD2	0.062653	0.638884
RDX	0.0626677	1.61133
SAMM50	0.0626799	1.91522
ITPR2	0.0627421	1.05966
AHCY	0.0628045	1.71165
NDUFAF2	0.0630285	1.46235
DYNC2H1	0.0630331	2.10682
PTP4A3	0.0631181	1.92533
ENSG00000284906	0.0632023	2.01057
ENSG00000279369	0.063519	0.399
CD160	0.0636577	-3.21196e-05
GCFC2	0.0638006	2.05549
PPP2R5E	0.063867	1.22134
PHLDA2	0.0642724	1.50261
HSPA1A	0.0644019	1.48345
JUN	0.0647876	-0.746312
RHOXF1	0.0647885	2.03585
FRMD3	0.0648118	2.60925
DSTYK	0.0648207	2.06004
CPEB4	0.06511	1.79831
DDHD1	0.0652104	-0.126648
C1orf159	0.0653027	1.83973
FLI1	0.0654478	-0.237203
CLIC1	0.0654539	-0.489707
RBCK1	0.0655823	-0.429612
TRGV9	0.0657801	-0.10705
SLC23A2	0.0660462	1.57029
PUM3	0.0660888	1.86651
RETREG2	0.0661601	1.63453
DAXX	0.0661681	-0.205423
EVL	0.0662644	-0.462414
MSN	0.0664755	-0.346842
CNOT6L	0.0665201	1.07876
ITM2A	0.0666816	-0.708267
INSIG1	0.0668763	1.0761
XCL1	0.067196	1.56367
PUDP	0.0672981	2.05543
NEU1	0.0675273	0.955341
TBC1D20	0.0675821	1.72159
TRAC	0.0677317	-0.40357
SELENOW	0.067805	-0.534192
CAPN10	0.0678982	0.0459568
KRT10	0.0680292	-0.529424
ORC2	0.0682051	1.64707
MFSD11	0.068512	1.47518
ZFAND1	0.0686188	1.9416
KCNA3	0.0686363	-0.525262
NIN	0.0687419	0.899133
WDR26	0.069039	1.1008
ELOVL6	0.0692667	1.80278
GTF3C1	0.0693619	1.33739
MAFK	0.0695932	1.78516
PIK3IP1	0.0698342	-0.142088
EARS2	0.069871	1.96602
ARF4	0.0699212	0.656996
MT-CO1	0.069948	0.55063
COA5	0.0701047	1.58899
SHISAL2A	0.0702263	0.183736
EMP3	0.0703561	-0.686817
HPCAL1	0.0706445	-0.137648
TCP1	0.0707213	0.882533
DAPK3	0.0710989	1.75155
ENY2	0.0714298	0.88457
TET1	0.071685	1.90598
RRAGB	0.0717478	2.00913
TGIF1	0.0717756	0.969125
DHX57	0.0718022	1.54198
ZNF562	0.0721151	1.83187
CEMIP2	0.0723196	0.995615
RAB7A	0.0724414	0.958533
PHF20	0.0727346	1.15693
PACSIN2	0.0727796	1.54196
LSM12	0.0728176	1.58874
KIF1B	0.0728473	1.47085
SEL1L	0.0729274	1.56361
CEBPZ	0.0729845	1.23092
SNAP23	0.0730175	1.27053
SRI	0.0730901	-0.475482
PSPC1	0.0732031	1.16936
PNISR	0.0733585	-0.410343
CHPT1	0.0733749	1.54221
WDR81	0.0734591	1.96191
PTPRK	0.0734666	1.39128
FAM53B	0.0737592	1.35077
TASOR2	0.0737808	1.27883
L3HYPDH	0.0738818	1.80459
STIP1	0.0740027	1.09126
BCKDHA	0.0740255	0.080244
KIF18A	0.0740316	1.83437
PRCP	0.074194	1.29378
MAN2A1	0.0743588	1.10185
RGS12	0.0745181	1.93083
RAPGEF1	0.0745466	1.13345
EBPL	0.074571	1.64859
H1-10	0.0746214	-0.389448
SSBP2	0.0747499	1.71422
PRF1	0.0748684	-0.525003
FBXO42	0.0749094	1.46746
IDH2	0.0749848	-0.460161
TRBV6-5	0.0753621	-0.965829
HYOU1	0.0756219	1.40771
SSNA1	0.075631	-0.351727
MIPEP	0.0756779	2.14113
FANCL	0.0757326	2.04219
C9orf85	0.0758528	1.82562
EXOSC4	0.0758676	1.48756
MID1IP1	0.076028	0.139836
REV3L	0.0762454	1.1073
HENMT1	0.0762904	0.248142
PGLYRP2	0.0764198	0.605136
CABLES1	0.0764874	1.81273
ZFHX3	0.0767855	1.96276
LRRFIP2	0.0768551	1.65439
PPP1CB	0.0769102	1.24758
CIAO2B	0.0769508	-0.344171
TCF7L2	0.0770295	1.64576
METAP2	0.0773252	1.06985
LCORL	0.0773494	1.59986
TMSB10	0.0774529	-0.490956
GLUD1	0.0776264	0.714663
STX7	0.0779009	1.70933
REPS1	0.0781296	-0.141532
MICU3	0.0781996	2.17694
RTKN2	0.0783108	2.20845
TAX1BP1	0.0784288	0.734289
FMNL1	0.0784686	-0.292108
TMEM164	0.0785541	1.86646
PPP2CB	0.0786962	1.39986
DTX3L	0.0792192	-0.0550131
GNAQ	0.0794519	1.57056
CISH	0.0795228	-0.360165
RPS18	0.0795372	-0.505041
IL16	0.0795567	-0.397522
SEPTIN1	0.0795592	-0.651271
BCKDHB	0.0796913	1.74116
ARL2BP	0.0798391	-0.471593
LSM6	0.079886	-0.56357
NPDC1	0.0799806	0.735234
SLC25A33	0.0801463	1.40725
NCOA6	0.0801641	1.46962
MLYCD	0.0803253	2.0222
PAK1IP1	0.0805746	1.58172
VIM	0.0807828	-0.591747
NFKBIE	0.0808827	1.11301
ZNF395	0.0808969	2.08676
ERBIN	0.0810632	1.00188
TLE5	0.0812048	-0.387552
IMMP2L	0.0814121	1.45225
TXNDC16	0.0815033	1.35318
DYRK2	0.081748	0.0280099
HYI	0.0817906	1.90726
SHKBP1	0.0819315	-0.0498872
CDYL2	0.0820649	1.56371
AGAP9	0.0828234	1.98678
RAP1GDS1	0.0829762	1.17224
SUCO	0.0830943	1.13804
LMF1	0.083178	1.52785
ZNF785	0.0833665	2.08181
POP1	0.0836779	1.98424
LGALS9	0.0837061	-0.172716
PAN3	0.083756	1.04094
MT-ND5	0.0837615	0.483561
FGD3	0.083833	-0.167533
PCCA	0.0840232	1.56855
IL5RA	0.0841757	0.522776
ALDH16A1	0.0842606	0.594541
SERPINB1	0.0842638	-0.358152
CRYZL1	0.0843455	1.85139
IFITM1	0.0844742	-0.773639
GLTP	0.0845963	-0.24766
PTGER2	0.0846567	0.00168712
TRBJ2-3	0.0852269	0.840474
JAKMIP2	0.0855783	1.34605
AGAP2	0.0855845	-0.0741253
ECE1	0.0857532	-0.22042
ANO10	0.0857737	1.7449
TRIM21	0.0858789	0.136037
TRBV7-2	0.0863715	-1.21529
HLA-DQA1	0.0866642	0.714596
PITPNB	0.0866999	1.2122
TRADD	0.0867338	-0.305573
RELA	0.0867397	0.0185553
CEP170	0.0868168	1.39821
RASL11A	0.0868218	1.78218
SLC38A5	0.0869325	0.0951554
FMN2	0.0871617	2.1549
NMD3	0.0872156	1.53483
NUP160	0.0872638	1.50637
DDX58	0.0874176	-0.10454
FCMR	0.0875158	-0.366896
PPIB	0.0875953	-0.452588
ZBTB46	0.0876402	1.94059
XAF1	0.0876985	-0.728725
GBE1	0.0877822	1.39135
COA1	0.0878743	1.35359
PER3	0.0879599	1.56117
NUP153	0.0879933	1.15379
TAPBP	0.0881704	-0.249837
BLZF1	0.0882433	1.51313
AGPS	0.0884546	1.53485
HLA-E	0.088473	-0.464979
ABCA5	0.0885752	1.72547
CUL5	0.0886521	1.43138
SYNGR2	0.0888903	-0.611277
KLRK1	0.0889687	-0.372762
MS4A6A	0.0889759	1.51489
SREK1	0.0890682	1.18994
SLC39A10	0.089126	-0.0673771
XPO1	0.0891439	1.03841
SLC38A2	0.0892108	0.56328
KLHDC1	0.0892829	1.87108
SLC1A4	0.0893894	1.7251
LDLRAP1	0.0895763	0.0346124
RASD1	0.0896585	1.77311
SIT1	0.0897743	-0.654284
FAM78A	0.089824	-0.153249
PRELID1	0.0898778	-0.551655
CD200R1	0.0899625	1.44973
RAB27B	0.0901821	0.373655
NOL6	0.0901978	2.01698
OAS3	0.0903328	-0.342161
RNF115	0.0903566	1.04264
BTN3A2	0.0905537	-0.314607
MTRR	0.0908813	1.77647
C2CD2	0.0909812	1.69875
GMFG	0.0911055	-0.420962
NME2	0.0911677	1.17318
TRAV8-6	0.0912457	0.246891
HDAC1	0.0914853	-0.150151
TRAV39	0.0914903	0.657419
MIGA1	0.0915818	1.29318
IER3IP1	0.0916653	1.6351
CCDC141	0.0917306	1.47839
POM121	0.0919958	1.17054
JKAMP	0.0920321	1.62078
GOT1	0.0921179	1.12488
TMA7	0.0926499	-0.358445
NUDCD1	0.0926949	1.92489
RPS27L	0.0931304	0.681832
NAALADL2	0.0931968	2.1615
APEH	0.093235	0.0818267
WBP2	0.0932667	-0.450161
HMGN5	0.0933306	1.9046
FOS	0.0934363	-0.470334
TMTC2	0.0935197	1.73877
BCS1L	0.0936363	2.02121
ERCC6	0.0937304	1.38307
STX6	0.0946154	1.80682
PPP6R3	0.0946228	1.11469
CHMP4B	0.0949772	1.57744
AGAP1	0.0950397	1.37908
NDUFA5	0.0952153	1.22638
ZNF438	0.0953213	1.56498
FXR1	0.0954419	0.932604
FBXL18	0.0955195	1.76421
TCTN3	0.0955338	1.23893
ALAS1	0.0955909	1.0351
PEX26	0.0956704	1.68849
SLX4IP	0.0958055	1.93392
PAIP1	0.0962124	1.68903
FADS2	0.0962502	0.82965
MT1E	0.0963759	-0.0977754
TRABD	0.0963877	-0.160526
ZNF506	0.0964122	1.37362
LRP8	0.0965931	1.78347
TCP10L	0.0967632	1.90029
RAB5B	0.0970505	1.75047
DLG1	0.0970919	1.26053
SCO1	0.0971441	1.86677
GRSF1	0.0972463	1.07442
IL2RB	0.0973422	-0.414777
TRAPPC1	0.097477	-0.416848
RICTOR	0.0975845	1.20888
RRP15	0.09765	1.95056
UGCG	0.0976599	1.54325
C2CD5	0.0977441	1.53634
SUSD3	0.0980188	-0.225335
TRBV5-4	0.098065	-1.08483
DNAJC25	0.0981943	1.77602
MEF2A	0.0982222	1.02399
NOP58	0.0982252	0.663481
RNF217	0.0982539	2.01458
KDM2A	0.0983111	0.728789
ITGB7	0.0984125	-0.0448437
TRAV5	0.0985056	0.242429
CYGB	0.0985259	1.87664
PAM	0.0985759	1.08672
B3GALNT2	0.09872	1.62976
GCA	0.0988465	1.50413
GPSM3	0.0988574	-0.440125
SENP3	0.0988889	1.68131
EP300	0.0989733	1.09358
ARL6IP5	0.0991434	-0.672796
ITM2C	0.0991525	-0.733392
TMLHE	0.0992664	1.80233
CSK	0.0993784	-0.418868
PARD3	0.0995767	2.09833
ECH1	0.0996296	1.17868
ARNT	0.0997729	1.44713
BLOC1S4	0.099945	0.0761351
MYL12A	0.10003	-0.495783
MXD4	0.100042	-0.531741
CD48	0.100114	-0.447349
UNC13D	0.100197	-0.161704
FMC1	0.100226	2.06647
GPX1	0.10039	0.701949
TRAV30	0.10061	0.28516
MAP4	0.100667	1.22403
DGKA	0.100779	-0.157383
B2M	0.100929	-0.479101
PSMF1	0.101238	1.27008
MIB1	0.10142	1.45182
ELAPOR1	0.101633	1.58712
TRAF5	0.101654	1.06158
VCP	0.101699	0.714961
SND1	0.101714	1.33914
APOE	0.101716	-1.03558
CTSZ	0.10179	1.13282
MTCH1	0.101868	0.837219
NECTIN3	0.101874	1.53074
DSTN	0.101964	1.36983
EIF2B4	0.102033	1.81459
ZNF462	0.102061	1.84699
LFNG	0.102162	-0.00422157
WHRN	0.102292	1.32829
RNF138	0.102292	1.04957
UBAC2	0.102407	-0.265812
HNRNPH1	0.102565	0.754754
FAM234A	0.102736	1.94767
FTSJ1	0.102868	-0.338718
ZNF322	0.103109	1.74422
AGTRAP	0.103148	-0.375515
UBB	0.103154	0.674813
NAP1L2	0.103332	1.7294
R3HDM4	0.103358	-0.246698
ZDHHC12	0.103653	0.16298
MUC12	0.103865	1.78552
P2RY11	0.104098	0.804466
BABAM2	0.104107	1.21361
GBA	0.104196	1.95606
RBM20	0.104408	1.74943
ATP1B3	0.104437	0.744674
ADD3	0.104458	-0.33124
RHOU	0.104995	0.730478
BTBD7	0.105175	1.15533
CCDC12	0.105721	-0.263206
CLIP1	0.105736	1.06652
TXNRD1	0.106194	1.35064
CTBP2	0.106309	1.67107
POLR3A	0.106424	1.88382
ENSG00000214265	0.106461	1.73258
FBH1	0.106465	1.76604
RING1	0.106489	1.20193
KMT5B	0.106544	1.14401
IPO9	0.106697	1.34961
SIL1	0.106875	2.1644
KIR2DS4	0.107045	2.042
TRBV9	0.107075	-0.903998
CCNB1IP1	0.107246	1.46991
HIBADH	0.107302	1.54905
MT-CO3	0.107374	0.700356
EIF2B3	0.107497	1.65815
AP1G2	0.107527	0.130569
ERLEC1	0.107665	1.06319
IDI1	0.107681	0.745389
ZCCHC4	0.107714	2.08891
EPAS1	0.10777	2.02192
HACD3	0.107771	1.83217
ZNF281	0.107778	1.34885
BTBD9	0.107851	1.13241
VPS50	0.107895	1.59004
MDM2	0.107976	1.47812
ZBTB2	0.108042	1.47955
KLRG1	0.10813	-0.477106
LETMD1	0.108178	1.48218
DYM	0.108275	1.16912
SLFN5	0.108283	-0.294266
CPOX	0.108323	1.26292
TMEM131L	0.108425	-0.108712
DYNC1I2	0.108577	1.47589
ATP2C1	0.1086	1.16011
DDX60	0.10866	-0.323868
ANXA6	0.108741	-0.221212
FAHD1	0.109048	1.74168
SEC11A	0.109072	0.968908
NAA16	0.109074	1.35899
INVS	0.109137	-0.0492073
CTNNA1	0.109535	1.72158
GLCE	0.109542	1.59546
ERAP1	0.109639	0.173664
PON2	0.109816	1.69058
USP18	0.109836	0.0551687
BAHD1	0.109985	0.263375
OGG1	0.110011	0.0750213
SP100	0.110014	-0.358196
CBWD1	0.110312	1.76931
CFAP61	0.110373	2.18407
IQCN	0.110415	2.03717
NDUFB6	0.110487	0.758923
MBNL2	0.11052	1.11552
ATRN	0.110582	1.62443
TMEM143	0.110584	2.0533
PPP1R14B	0.110687	-0.650141
FAM3C	0.111003	1.14399
DNM1L	0.11156	1.10402
ZC3H7A	0.111804	0.781125
TSHZ1	0.112242	1.20492
PCCB	0.11249	2.32899
IFIT5	0.11268	0.116151
NBN	0.112691	1.32074
SMAP2	0.112744	0.884042
H2BC12	0.112932	1.46
ZFC3H1	0.112979	1.19356
OPA1	0.113208	1.33108
KHDRBS3	0.113225	2.08511
ABTB1	0.113533	0.0250369
SOX10	0.113608	1.78
ANKHD1	0.113668	1.23078
RPS25	0.113703	-0.412946
TRBV11-1	0.113899	3.06497
PRR13	0.113906	-0.50803
SMIM26	0.113969	0.896235
LY96	0.11407	1.68319
IFI35	0.114593	-0.304491
RNF167	0.114974	-0.481589
LSP1	0.115135	-0.382113
ARF5	0.115175	-0.410789
LIMD2	0.115659	-0.457315
ILF3	0.115731	0.979569
CD247	0.116127	-0.304895
P2RY8	0.116134	-0.17553
APOBEC3H	0.116221	0.119268
PEX1	0.116362	1.53486
CORO1A	0.116466	-0.466347
DUSP22	0.1165	1.96824
FLT3LG	0.116551	-0.221194
ARL4C	0.116694	-0.426572
LIPE	0.116821	0.640351
BLOC1S6	0.116837	1.3804
RAB12	0.1169	1.36863
NOMO1	0.117125	1.77532
PLGRKT	0.117131	1.44621
IL32	0.117154	-0.500524
VPS54	0.11717	1.61328
RNF121	0.117199	1.66763
ZNF766	0.117888	0.104402
TMEM154	0.117947	0.0917559
ARPC5L	0.118098	-0.372144
ZFP36	0.118201	-0.734283
PCBP1	0.118254	-0.44671
STX8	0.118265	-0.227596
MAP2K5	0.118303	1.30275
TCF25	0.118325	0.67275
EIF2A	0.118368	1.11974
SLC25A32	0.118378	1.0704
RPSAP58	0.118499	-0.0357129
PPP1R18	0.118641	-0.396341
DAP	0.118664	1.57021
IKZF2	0.118865	1.05181
MAP3K1	0.118951	1.51877
ZNF20	0.119045	2.00236
ATN1	0.119204	1.23471
UBE2L3	0.119439	-0.293658
PIP4K2A	0.119439	1.26678
HLA-C	0.119526	-0.380531
GYS1	0.119785	1.93661
C16orf54	0.11992	0.140636
PABIR1	0.12057	1.66414
ZNF782	0.1208	1.61601
RNF141	0.120828	1.68143
IFNL1	0.120894	0.571774
GLA	0.120917	0.819572
CASP3	0.120952	1.21149
CD53	0.121351	-0.288861
ZFP14	0.121573	0.128032
ANKRD10	0.121611	0.719315
ZNF189	0.121667	1.72864
ELF1	0.121763	0.562378
DRG1	0.121841	1.35638
MXD1	0.121889	1.06276
PSMD1	0.122219	1.18288
SH3BGRL3	0.122346	-0.463136
HIRIP3	0.122838	0.200799
GNB2	0.123133	-0.31459
H2BC11	0.123136	1.65184
TXN	0.123469	0.72277
ADAM19	0.123543	1.68238
SMAD5	0.123589	1.74095
TRBV11-3	0.123638	2.03959
P2RY10	0.123803	-0.527874
IQGAP2	0.123847	-0.245608
CD37	0.124066	-0.472136
SLC10A7	0.124235	1.36135
PPCDC	0.124371	1.86834
NT5DC1	0.12447	1.41316
TRAV19	0.124523	-0.508715
RABGGTB	0.124619	1.01976
PARP12	0.124768	0.0583231
IMPDH1	0.124877	-0.0835336
CKS1B	0.124994	1.18875
LGR6	0.125096	-0.136853
ZNF10	0.125118	1.17427
PLCB3	0.12528	2.0257
TNFRSF25	0.125393	0.336081
SLAMF8	0.125532	0.920556
ILKAP	0.125543	1.21683
AVPI1	0.125859	1.59851
ACTR3	0.126045	-0.277351
HMGB2	0.126326	0.569662
OTUD3	0.126354	1.84237
TSR1	0.126642	1.80103
FAM136A	0.126884	1.25114
SMAD4	0.127018	1.30884
PIP4K2C	0.127239	1.50534
HBP1	0.127277	0.806357
ATF4	0.127291	0.78799
RB1CC1	0.127398	1.05011
GSTK1	0.127482	-0.292177
MAP7D3	0.127537	0.172699
H2AZ1	0.127572	0.690548
CEP70	0.127647	1.80692
FBXW7	0.128228	0.984689
RASGEF1A	0.12832	1.68781
DIP2A	0.128379	-0.384515
MED19	0.128399	1.25109
SUN2	0.128629	-0.349641
UBE2H	0.128741	0.988598
GGA2	0.128808	0.961402
KAT6B	0.128815	1.13496
CSGALNACT1	0.128906	0.581127
TMED10	0.128977	0.910145
JARID2	0.129001	0.964247
NAV1	0.129232	2.06403
TRPC3	0.129274	2.14856
RPIA	0.129555	-0.27599
SGSM2	0.129814	1.54643
MEGF9	0.130125	1.61213
CLDND1	0.130189	0.731243
MIER1	0.130236	-0.284369
INTS7	0.130258	1.58234
CHD9	0.130471	1.15633
ATP23	0.130628	0.113085
AKTIP	0.130733	0.11014
TYW3	0.13086	1.57511
SRGAP2B	0.130878	1.42493
TMEM165	0.13098	1.08535
NBPF12	0.13115	1.34902
TNKS2	0.131151	0.892218
NUP155	0.131377	1.57581
TMEM63A	0.131398	-0.0454392
EXOG	0.131464	0.355117
KMT5A	0.131606	1.49048
STAM2	0.131734	1.55851
CDC14B	0.131813	1.90301
MDGA2	0.132029	2.04283
NUP133	0.132266	1.40522
RABEP2	0.132304	1.57933
USP47	0.132359	0.83694
NRG2	0.132373	2.58333
TCEAL4	0.132457	1.62457
POLE3	0.13248	0.79496
ASAP1	0.132609	0.809389
AFF4	0.132676	1.00926
MARCHF3	0.133114	1.2361
B3GLCT	0.133132	1.61818
SAMHD1	0.133199	-0.278123
DBNL	0.133299	-0.0283663
GINS3	0.133376	2.02937
TGFBRAP1	0.133399	1.84704
TNFAIP8	0.13352	-0.188733
ACSL6	0.133522	0.573221
PTS	0.133646	1.23494
ARMC8	0.133724	1.35014
ZNF704	0.133999	1.53717
SLC12A9	0.134189	0.23623
PREX1	0.134199	-0.212372
ARHGAP22	0.134284	2.18694
KLF2	0.134308	-1.17556
SLC35B4	0.134983	1.63855
AREL1	0.135099	1.49322
EFCAB10	0.135162	2.02552
FLVCR1	0.135618	2.13987
PAX3	0.135713	1.51794
CYB5A	0.135754	1.42084
FAM120A	0.135768	0.994579
GNG12	0.135844	1.78305
CCT6A	0.136013	1.11952
PSMB10	0.136098	-0.324588
CDKN1C	0.13625	1.22392
BMPR1A	0.136308	1.76237
MTIF2	0.136386	1.68527
CCT3	0.136638	0.864177
SPIRE1	0.13665	1.93125
LPAR5	0.136916	0.415802
IL15RA	0.136947	0.164593
BCKDK	0.137086	1.91142
SPHK2	0.137606	1.74589
RMI1	0.137651	1.82854
DUSP1	0.137658	-0.427421
ARG2	0.137741	1.51374
ZNF669	0.138003	1.80158
RAPGEF2	0.138163	1.32081
ABCF2	0.138196	1.99933
PARVB	0.138326	2.06601
GOLT1B	0.138399	1.45785
ZNF737	0.138437	0.345398
PTGES3	0.138461	0.609279
ATP8B4	0.138686	0.587204
GALNT10	0.138795	-0.170093
COA6	0.138862	1.58893
SETDB2	0.138904	1.52776
CDKL3	0.138984	1.64232
FBXL17	0.139074	0.90089
LAS1L	0.139296	1.74852
C1orf50	0.139452	1.39728
EIF4G1	0.139503	1.14918
RNF14	0.139627	1.80284
RBM26	0.139691	1.19007
OTUD4	0.139783	1.04828
TIAM2	0.139804	1.39275
TRBV24-1	0.13996	0.217232
PYCARD	0.140633	-0.402009
WAS	0.140725	-0.186061
PPM1M	0.140734	-0.26104
KANTR	0.140823	1.21205
G6PD	0.140978	-0.191063
NLRC3	0.141232	0.162198
SELENOH	0.141302	0.751397
FLOT2	0.141506	-0.0622684
ANKRD30B	0.141525	2.04756
MNDA	0.141544	2.1629
PRRC1	0.141701	1.77282
ARHGEF6	0.141735	0.157616
MRPL21	0.141832	0.958677
GAS7	0.141887	1.74619
PPM1N	0.141941	0.840075
MYO18A	0.141966	1.65553
ARCN1	0.14214	1.30554
SIRT1	0.142251	0.984157
TBL1XR1	0.14259	0.918476
MYO5A	0.142747	1.11208
CPED1	0.142913	2.15194
GATM	0.142913	2.15194
TKT	0.142972	0.976244
PLSCR3	0.142982	-0.262423
ZFYVE16	0.143237	1.74401
FIGN	0.143263	2.03175
MAP4K4	0.143292	0.865843
SLC25A17	0.143404	1.67406
CPPED1	0.143548	1.79507
MAP4K3	0.143578	1.57393
SIDT1	0.143674	1.15312
IL11RA	0.143682	2.08671
LLGL1	0.143812	1.64318
HMGN2	0.143879	-0.411296
TNFAIP8L2	0.144123	0.66931
EIF4B	0.144229	0.925556
ZBTB7A	0.144286	-0.211988
FKBP15	0.144341	1.41909
PDXK	0.144623	0.997712
CTPS1	0.144669	1.43006
PRKAR1A	0.144702	1.1314
HNRNPC	0.144806	0.514044
CLIC4	0.144829	1.96794
ZBTB16	0.144956	0.548255
H2AC21	0.145314	2.06584
ARPC1B	0.145398	-0.468209
E2F6	0.14543	1.70973
TRAV8-3	0.145486	0.179969
YWHAQ	0.145536	0.704282
C11orf96	0.145588	1.6829
KLF6	0.146082	-0.551166
CENPN	0.146287	1.58041
CAMLG	0.146328	0.763454
CDC26	0.146607	-0.255476
DUSP28	0.146684	1.37152
RCBTB2	0.147009	0.0554438
C1orf162	0.147138	0.437324
STX11	0.147247	0.785872
KCTD17	0.147301	0.511143
SEPTIN2	0.147313	1.07892
CD5	0.147315	-0.0813959
EPB41	0.147348	-0.0861809
MIA2	0.147386	1.24915
NVL	0.147631	1.7926
RCAN3	0.147697	0.838004
GPATCH2	0.147701	1.73955
CAP1	0.147871	-0.195804
APOO	0.147887	1.69938
OSER1	0.147897	0.867424
FRA10AC1	0.14808	1.55766
TMEM273	0.148086	0.913687
GAN	0.148194	1.15387
APBB2	0.148438	2.05831
SEC24D	0.148494	1.01312
CITED2	0.148618	-0.521421
CENPT	0.148658	-0.0815273
CANX	0.149238	0.937443
CENATAC	0.149439	1.33022
RNF216	0.149441	1.0413
BRD7	0.149496	-0.454766
P4HTM	0.149516	-0.147781
NDUFAF6	0.149573	1.06445
CCDC93	0.149873	1.24414
ADARB2	0.149899	0.422302
IL12RB2	0.150097	-0.149452
PPP6R1	0.150127	-0.0291793
CLDND2	0.150169	1.87433
WDR12	0.150193	1.77778
TAP1	0.150275	-0.321094
IRS2	0.150417	1.78964
RUVBL2	0.150631	1.58914
CDC7	0.15071	0.620078
SLC16A3	0.150759	0.943316
DCBLD1	0.150937	0.570379
B4GALT5	0.151146	1.51192
TIMM21	0.151218	1.70344
COMMD1	0.151296	1.03508
NIBAN1	0.151318	-0.543872
YOD1	0.151446	1.61463
YPEL3	0.151578	-0.453112
FGD4	0.151581	1.66277
ANXA4	0.151884	1.61746
CAAP1	0.151969	1.10789
AAMDC	0.151978	1.29926
NANS	0.151989	1.08448
TNFRSF9	0.151995	0.920528
CASP7	0.152017	0.0458775
CDK12	0.15208	1.08255
NIPSNAP2	0.152084	1.56156
RBM47	0.15209	1.87105
CD3D	0.152095	-0.480482
TRIB1	0.152317	1.94977
CBX1	0.15269	1.42741
CLIP2	0.152718	1.756
TENT4A	0.152722	1.4286
RPL41	0.152736	-0.394466
SRSF5	0.152811	-0.321244
MCUB	0.152873	-0.108558
UBL4A	0.152912	0.450168
MX1	0.152975	-1.00619
MUTYH	0.15302	0.199114
S1PR1	0.153094	0.229423
C5orf24	0.153306	1.54345
DCAF1	0.153543	1.27746
NRARP	0.153631	1.67214
RNF13	0.153914	1.0556
AP3M2	0.154157	1.50922
SLC39A7	0.154205	1.58678
HAUS4	0.15424	1.41129
PGRMC1	0.154292	1.52266
EPB41L2	0.154297	1.52971
ORC3	0.154335	1.41438
MIIP	0.154528	0.00757012
S100A6	0.15486	-0.411858
ADRB2	0.155164	-0.0835052
SNAP29	0.155343	1.50332
SDCCAG8	0.155426	1.14044
RPL3	0.155728	-0.390828
BLVRA	0.155966	1.19247
BTN2A2	0.155986	1.50831
PAPOLA	0.156123	0.788642
BZW2	0.156164	1.06235
PILRA	0.156184	1.95454
TARDBP	0.156197	1.25611
IL9R	0.156504	0.374049
GLO1	0.156507	1.44149
UBE2A	0.156529	0.538556
ZBTB43	0.156531	1.30776
PMVK	0.156605	0.160163
TOR1B	0.156944	1.34082
GLMP	0.15704	1.56804
UROS	0.157141	1.30803
ZNF274	0.157247	0.310558
NAB1	0.157265	1.19961
ABCB10	0.157326	1.62409
ORMDL3	0.157401	-0.123154
RCHY1	0.15748	1.11896
SYTL3	0.157504	0.614571
R3HDM2	0.157662	0.929757
BIRC3	0.157973	0.587556
RHOG	0.158188	-0.270468
ISCA2	0.15826	0.126561
L3MBTL4	0.158354	1.53511
KPNA6	0.158422	1.09955
BST2	0.158451	-0.401328
RSL24D1	0.158601	0.511872
RTN4	0.158822	0.979569
MRPL32	0.158919	1.26961
PTPMT1	0.158968	1.56581
RBM14	0.158984	1.37598
USP48	0.159078	1.19546
C1orf52	0.159194	0.717658
PIGP	0.159324	1.53195
SERTAD2	0.15935	0.90868
ARFGAP1	0.159446	1.69095
CSNK1A1	0.159553	0.837731
CLASP2	0.159651	1.17021
CIITA	0.159672	1.72162
CEP83	0.159776	1.3669
ACOX1	0.159893	1.85205
FAM83D	0.159932	1.63045
CFH	0.159961	0.87441
TAPBPL	0.160221	0.0559176
AP2B1	0.160229	0.973125
GTF2B	0.160359	0.584771
RBFOX2	0.160384	1.73772
SCAMP3	0.160502	1.29931
UQCRH	0.160579	0.563603
BTBD10	0.160896	1.11259
CD59	0.161131	1.58796
ACTG1	0.161188	-0.448823
MAML3	0.161528	1.29428
SP4	0.16174	0.0617529
COX20	0.161823	0.926423
CCL5	0.161825	-0.394772
SLC5A3	0.161976	1.28264
SC5D	0.162099	1.21251
EFNB1	0.162159	1.83451
AOPEP	0.162295	1.39788
SAMD4B	0.162323	1.35897
INTS6	0.162329	0.700014
TAFA1	0.162429	2.1186
DOCK4	0.162631	2.01923
ADAM9	0.162683	1.65982
PIAS1	0.162883	-0.349442
ENSG00000286905	0.162983	2.15167
CCNC	0.163024	1.71051
TCEAL9	0.163099	2.00037
CD70	0.163213	0.774457
MYL6	0.163402	-0.347939
PMCH	0.163406	3.03816
DXO	0.163419	1.35177
GIMAP6	0.163427	-0.237508
CFAP97	0.163514	1.34865
DGCR8	0.163954	1.88299
ELK3	0.164173	1.58416
TBC1D32	0.164177	0.0638657
ALKBH8	0.164213	1.76824
DUSP16	0.164408	1.17521
MLF1	0.164479	1.51153
RASSF5	0.164533	-0.248355
MLEC	0.164572	1.36085
NQO1	0.164834	1.75331
NOP56	0.164874	0.96803
FAM126B	0.16517	1.1548
HEMK1	0.165183	0.488989
TXNDC17	0.16525	0.8079
QTRT2	0.165255	1.61485
FAM102B	0.165545	0.766464
CENPF	0.165779	1.25682
KRT18	0.165973	1.90879
MRPS21	0.165979	0.650945
ADCY9	0.166035	1.88471
MFSD12	0.166081	1.82894
COQ7	0.166368	1.18742
ATG9A	0.166535	1.57911
OSBPL9	0.166836	1.31777
LIPC	0.166925	1.52639
CREM	0.167015	0.773332
ADPRS	0.167099	1.46259
TM9SF2	0.167112	1.22675
ARL6IP4	0.167142	-0.299092
MICU2	0.167338	1.16778
LAPTM4A	0.16747	1.02216
BLOC1S1	0.167517	-0.353831
PSMB7	0.167619	1.15547
CCDC47	0.167688	1.09226
FAM91A1	0.167719	1.7625
RBM28	0.167937	1.6835
CHD4	0.168176	0.833681
DPY19L2	0.168311	2.02823
HMGCS1	0.168409	0.89448
ARHGDIB	0.168447	-0.287464
HPS5	0.168448	1.61124
ZGPAT	0.168603	0.12536
HACD2	0.168621	1.44373
RBM19	0.168674	1.38138
MKLN1	0.168703	0.820547
SIN3A	0.16895	1.13837
BMT2	0.169014	1.39933
SAT1	0.169288	0.524681
NDUFS6	0.169324	0.70461
COMMD5	0.169431	1.49436
STYX	0.169493	0.0290977
TRAF3IP3	0.169612	-0.246291
TSC22D4	0.169801	-0.286521
FBRS	0.169815	1.14678
ARRDC1	0.169818	-0.118264
RNF11	0.169911	1.2244
DENND3	0.169989	1.577
ABCB5	0.170027	1.58984
MTIF3	0.170104	0.992513
CD274	0.170178	1.89068
RPS10	0.17043	-0.392327
DERA	0.170435	1.69397
TYW1	0.170482	1.25857
ATE1	0.170692	1.20135
SPARC	0.170786	1.74027
SUCLG1	0.170875	1.18004
ALG6	0.170925	1.53891
MLPH	0.170989	1.66457
CALM3	0.171062	-0.523128
ZNF621	0.171322	1.60521
TSNAX	0.171375	1.31798
RPS4X	0.171395	-0.392148
FOXO4	0.17148	1.64148
EEFSEC	0.171731	1.39623
SNX5	0.17181	0.735942
PIP4K2B	0.171821	1.62628
ZNF90	0.171951	2.07889
NBEAL2	0.172044	-0.0603752
PIGT	0.172068	1.18751
PAGR1	0.172116	-0.117832
CAND1	0.172309	0.908405
ZYX	0.172677	-0.144975
NMT2	0.172766	0.161429
USE1	0.172905	1.56699
FKBP11	0.172971	-0.337839
MTCH2	0.172974	1.40625
COPE	0.17303	-0.270655
SLC2A13	0.173323	1.41421
CYB5B	0.17336	1.17571
MTMR10	0.173363	1.72811
URB1	0.173445	1.75154
TOB1	0.173474	0.86732
VASP	0.173597	-0.158122
NUDT4	0.17409	0.846165
AQR	0.174208	1.49869
ARRB2	0.174238	-0.0577289
STXBP2	0.174371	-0.109613
FYB1	0.174511	-0.230034
POU2F2	0.174643	0.235892
TNRC6C	0.174693	-0.0669356
FXYD6	0.174745	1.71599
PIGV	0.174746	0.630599
TAB2	0.174749	1.11029
SNAPC4	0.174799	1.75158
CCR2	0.175081	0.218296
CLK3	0.175187	-0.139997
SECISBP2L	0.175217	1.20069
MRPL58	0.175233	0.0321267
AGO1	0.175356	1.5371
TIAM1	0.175466	1.4433
AURKA	0.175493	1.74463
TP53I11	0.17568	0.0445203
GBP1	0.175696	-0.42707
MED12	0.175709	1.46634
VSIR	0.175738	0.0200326
BBLN	0.175773	-0.284524
MSI2	0.175986	0.9431
ATP11C	0.17607	1.54109
BTN3A3	0.176156	-0.184677
ZNRF2	0.176362	-0.158971
MT-ND4L	0.176566	0.383233
GRAP2	0.176708	-0.119232
SMARCC1	0.176742	1.14232
QTRT1	0.17693	1.3376
ARL8A	0.177205	-0.000574568
TNRC18	0.177283	1.39672
ARHGAP17	0.177474	1.11703
RAB8A	0.177733	-0.153645
LBR	0.1779	-0.212917
USP14	0.178272	1.05003
RPSA	0.178284	-0.350372
XPOT	0.178321	1.45499
USP21	0.178581	0.393139
UNC93B1	0.178739	0.723476
RAN	0.178839	0.397076
NAPA	0.178891	-0.372772
DNAJB1	0.179022	0.991312
BIRC2	0.179027	0.92434
APPBP2	0.179045	1.18265
TCEAL3	0.179089	1.31606
GOLGA3	0.179221	1.58266
PTK2B	0.179225	-0.275364
KLRD1	0.179225	-0.306828
TMEM242	0.17943	1.42596
TAF11	0.179506	1.00436
WBP11	0.179568	0.818432
PATJ	0.179601	0.0553167
RPL9	0.179636	-0.345485
ZNF581	0.179828	1.33496
HOOK3	0.179925	0.996392
LAT	0.179945	-0.413541
TRAM1	0.18003	0.668733
PRPF31	0.180165	0.0782312
ELOC	0.180181	0.679165
SLC9A1	0.180386	1.39668
ZAP70	0.180517	-0.139666
RGS20	0.180532	1.65563
ERG28	0.180828	1.08532
PRPF39	0.180832	1.20284
FNIP2	0.180894	1.55621
COLEC12	0.180966	2.18074
ARID3B	0.180998	-0.0788557
PIEZO1	0.181188	1.08676
ANO9	0.181438	-0.058179
ARID5A	0.181461	-0.348248
MTHFD1L	0.181461	1.74976
NDUFA9	0.181526	-0.266641
RPL27A	0.181687	-0.377129
EIF3J	0.181706	0.801922
ASB3	0.1818	1.05247
DNAJB12	0.182081	1.45053
USF2	0.182176	1.23342
PRNP	0.182188	0.862775
ARL8B	0.18219	1.08532
NUCB2	0.182376	-0.161256
FKBP8	0.182408	-0.303213
ZFYVE26	0.182466	1.56073
H1-2	0.182507	0.900294
ZBTB14	0.182555	0.556542
CCNE2	0.182589	1.45805
TMEM80	0.182878	0.55398
YAF2	0.18307	0.877244
RABGAP1	0.183076	0.904494
WARS1	0.183524	1.03775
VPS26A	0.183531	1.05562
CPEB3	0.183589	1.75707
HSD17B7	0.183882	1.01195
RAB33A	0.18397	0.198595
FAF1	0.184111	0.689965
GSK3A	0.184237	-0.118585
TMSB4X	0.184292	-0.372221
C1D	0.184344	0.0859381
RNF10	0.184351	0.901005
PDE6D	0.184356	1.25813
LPXN	0.184371	-0.452308
R3HCC1	0.184678	0.471149
REC8	0.184692	0.345499
RXRB	0.184785	1.63697
TMEM135	0.1848	1.45258
MTF2	0.184984	1.20872
MRPL13	0.185009	1.40349
IFI27	0.185092	-0.732544
SSBP3	0.185159	1.23543
RHEBL1	0.185266	1.25088
IMP4	0.185716	1.12594
CREG1	0.185735	1.75181
MINK1	0.185787	1.23131
ZXDC	0.185788	-0.00667237
PSTPIP1	0.186163	-0.281079
PLEKHB2	0.18628	1.03899
GPATCH2L	0.186366	1.30684
RPL24	0.186401	-0.341012
PIGN	0.186402	1.64023
PITHD1	0.186419	0.863872
PIM1	0.186464	-0.190884
NT5DC3	0.186476	1.84769
CPNE2	0.186638	0.394114
CRTC2	0.186689	1.20575
CARD8	0.186689	-0.118043
CTNNBIP1	0.186807	1.72734
RBMS1	0.187083	0.0296382
SKP2	0.187792	0.675399
TEX2	0.187834	1.86062
IL6ST	0.18785	0.803944
RPLP2	0.187974	-0.314649
EIF2AK2	0.187998	-0.65483
SENP6	0.188047	0.875693
BICRAL	0.188054	1.10027
KLHL7	0.188149	1.3176
KLHL17	0.188273	1.55887
ANKMY2	0.188332	1.61529
DLST	0.188567	1.14801
KNOP1	0.188735	2.12861
EPB41L3	0.18874	1.64271
CYFIP2	0.188778	-0.0131986
VAT1	0.189119	1.62856
TOMM20	0.189135	0.675666
SNF8	0.189374	-0.133611
ADAM8	0.18968	-0.0851847
PIK3C2A	0.189727	1.17501
TTC39B	0.189762	0.212393
MRPL20	0.189777	0.68712
MRPS25	0.189816	1.42158
MRPS16	0.189832	1.24742
ZNF66	0.189855	0.00370918
DYNLT2	0.189903	1.53552
ZNF771	0.190532	1.9673
FAM135A	0.190649	1.52335
DEDD2	0.190717	0.762833
IPO4	0.190795	1.7646
UBLCP1	0.19081	-0.108762
RAD23B	0.190906	1.10723
WDR20	0.191144	1.23155
DIS3	0.191257	1.17662
PDK3	0.191408	0.0486323
SLAMF1	0.191433	0.0756242
ATG14	0.19145	1.37133
PPP3CC	0.191457	-0.14533
FAM76B	0.191481	0.970763
CAMK1D	0.191492	-0.234803
NCOA1	0.191635	0.773016
SLC66A2	0.191688	1.29305
CHAC1	0.191719	1.52545
LAMTOR5	0.19198	0.685193
GRK2	0.192032	0.00540608
NEK7	0.192061	0.719389
PEX19	0.192131	1.63163
NIT2	0.192356	1.31987
ATP13A3	0.192434	1.04043
BRAT1	0.192435	0.0748031
ZSCAN2	0.192517	0.706304
ST3GAL2	0.192567	1.44369
SEPTIN11	0.192665	1.00333
CCDC125	0.192694	1.54189
NAIP	0.193244	1.45365
CDR2	0.193291	1.02572
MTHFD2	0.193294	0.864272
NABP2	0.193458	0.261352
HECTD1	0.193512	1.17253
PHYKPL	0.193551	-0.122994
PPRC1	0.193636	1.53428
TMEM185A	0.193836	1.58841
ETF1	0.193978	0.925535
ENTPD6	0.194077	1.5237
COX18	0.194177	1.54995
CYTH2	0.194542	1.26692
S100A10	0.194552	-0.468832
STS	0.194626	1.73942
PDXP	0.19466	1.62635
GPM6B	0.194677	1.67706
OLA1	0.194767	1.0925
TP53INP1	0.194834	1.26104
RPS3	0.194863	-0.380365
KBTBD4	0.194892	1.70334
HLCS	0.194897	1.37288
SUCLG2	0.195133	1.13712
NGRN	0.195152	0.760959
SQLE	0.195405	1.12338
KCTD5	0.195503	1.61049
PREPL	0.195507	1.14683
IGHV1-3	0.195593	0.421457
SLIRP	0.195621	0.954217
SERTAD3	0.195671	1.12899
NNT	0.195732	1.44533
TXLNG	0.195858	1.04676
IFITM2	0.195868	-0.604725
PLCL2	0.196035	0.169596
TMA16	0.19612	1.54449
SYNGAP1	0.196199	1.48199
C15orf61	0.196207	1.33403
ACAA2	0.19639	0.169772
VTA1	0.196419	-0.451009
UBXN6	0.196464	1.60475
SLC25A51	0.196524	1.55587
ZC3HC1	0.196678	1.66417
CCDC117	0.196709	1.56943
TFDP1	0.19683	1.3867
GEMIN6	0.196963	1.66846
TACO1	0.197	0.500367
ANKLE2	0.197043	1.23367
TSPAN5	0.197143	1.07394
SLA2	0.197239	-0.0832739
CCDC138	0.197317	1.38807
ZNF326	0.197471	1.12464
CKAP5	0.197633	1.55262
CAPRIN1	0.197729	1.66257
SPPL2A	0.197898	0.784362
SRA1	0.19807	0.822178
CYB561D2	0.198183	0.135721
PLEKHF1	0.198346	-0.138275
C2CD3	0.198586	1.41109
PDHA1	0.198624	1.38129
PCNA	0.198641	0.970751
DNAJC1	0.198741	0.549035
TMED3	0.199081	1.42298
ZFAND6	0.199168	0.926604
USP42	0.199231	1.1342
NDUFC2	0.199267	1.75977
TRAV12-3	0.199406	0.302563
SYTL2	0.199458	-0.389865
CCNG1	0.199662	1.15464
SORL1	0.199771	0.0727106
CD2	0.199877	-0.383884
AKT3	0.199991	0.942676
ANKRD40	0.200072	1.63997
PLAAT4	0.200119	-0.40513
MICAL3	0.200225	1.43625
KLHL20	0.200434	0.0368958
PHIP	0.200444	0.7559
TBC1D15	0.200807	1.2143
MDH1	0.200856	0.836202
SPTLC1	0.200873	1.39185
PMEL	0.201076	-1.0523
EXOC6B	0.201101	1.63357
WDR47	0.201217	1.00339
CADM1	0.201244	1.04632
MOB1B	0.201244	1.26372
PSMD7	0.2015	-0.121628
BEX4	0.201553	1.28701
CNN2	0.201683	-0.377775
UBE2G1	0.201753	1.09354
RNASET2	0.201909	0.0608079
SRBD1	0.202123	1.342
HERPUD1	0.202244	0.415792
TFDP2	0.202329	1.31013
AZI2	0.202395	1.42437
NDUFAB1	0.20242	0.974807
SGPP2	0.202491	1.12759
ROCK2	0.202608	1.24161
CDKN1A	0.202653	1.38838
AMMECR1	0.202796	0.377187
USP20	0.202897	0.188776
ASPH	0.203062	1.84124
ZSCAN22	0.203064	1.7941
PSMA7	0.203103	-0.308159
FBXL20	0.203179	1.10912
SH3GLB1	0.203294	0.623188
NAXE	0.203303	1.16918
ZFAND5	0.203399	0.634568
HSPA9	0.203615	0.596022
PHF14	0.203972	0.933769
CCR5	0.204034	0.172332
KIF2A	0.204162	-0.0866921
SMURF1	0.204172	1.20883
TBC1D9	0.204179	1.84687
THUMPD3	0.20426	0.339617
LONRF1	0.204408	1.6749
CASP1	0.20442	-0.0277732
STK17B	0.204503	0.421068
DPY19L4	0.205101	1.64331
THAP8	0.205136	0.952021
KRAS	0.205219	-0.219923
SAMSN1	0.205412	0.557554
TMUB2	0.205518	-0.158916
TACC3	0.205616	-0.0514518
CSTPP1	0.205787	1.31861
NEDD4L	0.205802	1.51487
TIMM50	0.206108	1.57373
HSPA2	0.206257	1.43561
METTL23	0.206272	0.155274
P2RX5	0.206439	0.371359
LARGE1	0.20649	1.73786
HDAC3	0.206495	0.994484
DUS1L	0.206565	1.02593
DUT	0.20664	-0.14013
LRRC8C	0.206657	-0.195102
TOX	0.206704	0.681947
RAPGEF5	0.206853	2.35471
RBM38	0.206912	-0.111458
ZNF296	0.206913	1.08433
ADIPOR2	0.206914	1.34621
SLC1A5	0.206995	0.952303
LZTS2	0.207026	1.92932
AZIN1	0.207043	0.791689
STAT3	0.207059	0.393278
MYO19	0.207254	1.24532
STX1A	0.207316	0.808754
CNIH4	0.207414	0.973216
BROX	0.207434	1.19236
ARIH1	0.2075	0.543032
WSB2	0.207505	1.03587
GDAP2	0.20758	1.15676
TTC9C	0.20762	1.2547
MAGI2	0.207777	1.81547
S1PR4	0.207929	0.0546046
FZD6	0.207966	1.84311
UBE3C	0.208094	1.10315
SELENOI	0.208288	1.15835
SSBP4	0.208307	-0.161142
FIBP	0.208468	-0.0500263
DDX31	0.208626	1.74126
OGFR	0.208808	0.0801223
GIMAP4	0.208817	-0.354295
POLH	0.209146	1.32217
YJU2B	0.209255	0.912412
RBM17	0.209293	-0.433942
PPP2R2B	0.209616	-0.0672675
DIAPH1	0.209754	-0.0270878
UNK	0.209853	1.25529
TMEM14C	0.209887	1.40702
FAM193A	0.209896	1.3946
WSB1	0.209899	0.572716
SBNO2	0.209903	1.40958
KPNA4	0.210185	0.921361
CWC15	0.210249	0.896517
SEPTIN7	0.210391	-0.213531
DYNLT2B	0.21044	1.58039
EPS8L2	0.210546	1.41116
CAPN3	0.210554	1.65541
GOLGA1	0.210638	1.3382
GSTM3	0.210683	1.44526
TARS3	0.210782	0.935218
MTF1	0.21086	1.481
ACTR10	0.210868	1.15806
SUZ12	0.210893	-0.305013
TSEN34	0.210905	0.908755
CHTF8	0.210921	0.566662
HSPA8	0.211069	0.461856
KIR3DL2	0.211105	1.7895
UBA2	0.211116	1.25533
UBE4B	0.211121	1.35421
IMPDH2	0.211436	1.0806
AMPD3	0.211484	0.35463
ZNF248	0.211611	1.58146
UBAC1	0.21165	0.0192917
PRAG1	0.211803	0.271631
BRPF3	0.211848	1.55114
TSPAN17	0.211853	0.408143
RPA3	0.211869	-0.288495
NFKBIA	0.212087	-0.617652
SRP54	0.212106	0.822894
TRAPPC12	0.212197	1.37854
MRPL43	0.212582	0.00140201
BAIAP2L2	0.212713	2.02409
ACADM	0.212718	1.25796
JAK1	0.212743	-0.2149
ARHGAP5	0.212953	1.30344
LARP4B	0.213109	0.968439
MCRS1	0.213377	0.287883
PAOX	0.213565	0.62604
ATP9A	0.213573	1.81564
ORMDL1	0.213598	-0.380619
EIF5	0.213631	0.398155
ENSG00000281741	0.213761	0.762167
CD69	0.213771	-0.437803
TMEM238	0.213854	0.0687678
SLC35B1	0.213861	1.14931
NUDT3	0.213888	1.19714
FCHO2	0.213914	1.98104
RNASEH2C	0.214166	0.0275878
ZNF502	0.214206	2.07076
ZNF473	0.21442	1.95509
ZNF678	0.214603	1.69049
FAM210A	0.214841	1.6622
C1GALT1	0.214956	-0.201367
NEMP2	0.215271	1.92538
EVC	0.21528	1.96371
RABGEF1	0.215319	0.890599
ETV6	0.215391	1.05421
TBC1D10C	0.215578	-0.135028
NAAA	0.215793	0.238222
TBCA	0.215829	0.600623
TYROBP	0.215895	-0.0279631
ARHGEF12	0.215933	1.27573
IRF7	0.21595	-0.373926
COX5B	0.216275	-0.412825
SOS1	0.216312	1.34637
PTOV1	0.216475	1.19107
MAGEH1	0.216484	1.33617
RGS19	0.216589	0.0793388
DMPK	0.21682	1.51842
SLC25A44	0.216922	1.17055
PGAP6	0.217014	0.107035
SSR4	0.217291	-0.276167
ANAPC16	0.217312	-0.294283
CLDN15	0.217357	0.696588
PRPF38A	0.217357	0.101226
MEI1	0.217453	0.348101
ZCWPW2	0.217527	1.67893
TMBIM6	0.217546	-0.392618
METTL9	0.2177	1.00824
SNRPD3	0.217801	1.35903
HOOK2	0.21794	-0.288289
MYO10	0.218077	1.39865
ZKSCAN8	0.218078	1.60337
IL17RA	0.21816	0.139229
MRPL9	0.218196	-0.0208589
PDCD10	0.218371	-0.207938
TIMP2	0.218491	1.39004
FAM210B	0.218534	1.51107
UTP23	0.218553	1.21855
VPS11	0.218692	1.27606
SORT1	0.218941	1.7127
TPM1	0.219039	1.68089
RPUSD1	0.219046	1.50947
SRSF1	0.219066	1.25866
RGS10	0.219254	-0.323864
SENP7	0.21926	-0.0664772
RAMAC	0.21967	0.887941
MTA1	0.219818	1.51155
CHORDC1	0.219835	0.594756
NPIPB13	0.220079	1.45302
STYK1	0.220336	0.499581
NEDD9	0.220585	0.736688
SHOC2	0.220638	0.946611
ARFRP1	0.220789	-0.028688
HIPK3	0.220915	1.22807
AMD1	0.221143	0.596853
METTL8	0.2212	1.33162
PDCD6IP	0.221294	0.92488
APOM	0.221355	0.925913
SEC23B	0.221439	0.300068
QRSL1	0.221598	0.612341
SLMAP	0.221735	1.20202
TRAPPC4	0.222053	0.710847
WDR11	0.22206	1.28373
ENGASE	0.222323	1.37478
TMEM35B	0.22279	-0.0415606
IGFBP4	0.22293	0.296252
BRI3BP	0.223077	1.68577
SPSB1	0.223402	1.64014
USP25	0.223568	0.0301199
JTB	0.223617	1.29684
PER2	0.223664	1.46944
HIPK2	0.223923	1.23238
SMURF2	0.223925	0.814027
AP5M1	0.224115	1.3156
MTPAP	0.224283	1.93142
RECK	0.224338	1.7307
DNAJC19	0.224371	0.824692
ZNF718	0.224393	0.408833
PACS1	0.224447	0.0615796
ZNF790	0.224525	1.57578
VIRMA	0.224699	1.36722
EPS15	0.224838	0.846071
VPS41	0.224953	1.32054
TRGV2	0.225123	1.51632
TMEM134	0.225237	0.0783778
COTL1	0.225345	-0.335471
DMAC2L	0.225492	1.48686
CNR2	0.22553	0.978553
FDXR	0.22581	1.65211
MT1X	0.22592	-0.324017
FILIP1L	0.225981	1.35303
TPRG1	0.226028	0.0514146
FCF1	0.226059	1.66908
CDK10	0.226071	0.0982407
CAPZB	0.226154	-0.230694
LPIN2	0.226383	-0.139714
BORCS7	0.226397	1.48679
SYNE3	0.226581	1.05177
PSMB5	0.226787	1.26116
TOMM70	0.22692	1.3475
SH3BP1	0.226931	0.157705
OST4	0.22708	-0.286108
MRPL34	0.227094	0.874579
FRMD6	0.227157	1.50375
KATNB1	0.227217	1.82295
ZBP1	0.227274	0.0237819
TOGARAM2	0.227358	0.680556
MGP	0.227427	2.41151
CHAMP1	0.2275	1.56019
TXNDC11	0.227532	1.07192
CDC123	0.227574	0.981286
BTBD1	0.227645	1.16204
UBE2E2	0.227737	1.70878
CTDNEP1	0.227754	-0.126058
TNS3	0.227817	1.97838
TGFBR2	0.227843	-0.333782
C16orf87	0.227901	1.05781
VEZF1	0.228281	1.3509
NUP35	0.228301	1.41253
KBTBD2	0.228482	0.924914
MEX3C	0.228653	1.3137
ARHGEF18	0.228731	0.0285425
ACTA2	0.228756	1.43464
FANCI	0.228931	1.68382
HMOX1	0.229008	1.61693
RNF149	0.229058	0.51577
WDR77	0.229067	0.490935
ADNP2	0.229161	1.29465
CTCF	0.229279	1.13819
AKAP12	0.229554	1.70518
TSC22D3	0.229587	-0.666451
HDHD3	0.229625	1.10298
PYGO2	0.229742	0.344464
UBE3A	0.229759	0.89954
RAB5C	0.22991	1.02561
TENM1	0.230037	0.992583
STMN3	0.230045	0.115138
NDUFB8	0.230311	1.34219
SCYL1	0.230327	1.14762
CHPF2	0.230382	0.525755
SNTB1	0.230418	0.216791
GLRX5	0.230454	0.873089
FUBP3	0.230494	1.68209
ODF2L	0.230548	0.989432
TAOK3	0.23073	0.726627
SFSWAP	0.230771	0.818136
ANKRD17	0.230778	0.790707
IP6K1	0.230967	1.12931
TRAV12-2	0.231088	-0.329614
CCDC167	0.231213	-0.0221834
TRA2B	0.231214	0.425511
CASP6	0.231269	0.389209
PHYH	0.231354	1.25047
SLC25A24	0.231512	1.24221
CSNK1E	0.231604	1.2435
[truncated: 18,272 more rows]

## Sheet: Supplementary Table 5
Gene	NhoodGroup
ADAM23	NhoodGroup 1
AKAP6	NhoodGroup 1
B2M	NhoodGroup 1
BTBD9	NhoodGroup 1
CITED1	NhoodGroup 1
COX6C	NhoodGroup 1
CRYAB	NhoodGroup 1
DNAJB1	NhoodGroup 1
DOCK10	NhoodGroup 1
EGLN3	NhoodGroup 1
GDF15	NhoodGroup 1
GNG11	NhoodGroup 1
HLA-A	NhoodGroup 1
HLA-B	NhoodGroup 1
HLA-C	NhoodGroup 1
HLA-E	NhoodGroup 1
HSPA1A	NhoodGroup 1
HSPA1B	NhoodGroup 1
HSPA6	NhoodGroup 1
HSPB1	NhoodGroup 1
IER5	NhoodGroup 1
IGFBP7	NhoodGroup 1
ITPR2	NhoodGroup 1
JUN	NhoodGroup 1
LGALS1	NhoodGroup 1
LGALS3	NhoodGroup 1
LHFPL3	NhoodGroup 1
MME	NhoodGroup 1
NFKBIA	NhoodGroup 1
PHACTR1	NhoodGroup 1
PIR	NhoodGroup 1
PPP1R15A	NhoodGroup 1
S100A1	NhoodGroup 1
SGK1	NhoodGroup 1
TRAK2	NhoodGroup 1
TULP4	NhoodGroup 1
TYRP1	NhoodGroup 1
UBC	NhoodGroup 1
WARS1	NhoodGroup 1
ADM	NhoodGroup 10
ALDOA	NhoodGroup 10
ATF3	NhoodGroup 10
ATP5MC3	NhoodGroup 10
ATP6V0C	NhoodGroup 10
B2M	NhoodGroup 10
C12orf57	NhoodGroup 10
CA12	NhoodGroup 10
CHCHD6	NhoodGroup 10
CITED1	NhoodGroup 10
COX6C	NhoodGroup 10
COX8A	NhoodGroup 10
CSTB	NhoodGroup 10
CYC1	NhoodGroup 10
CYGB	NhoodGroup 10
DDIT3	NhoodGroup 10
DNAJB1	NhoodGroup 10
DOCK10	NhoodGroup 10
EEF1B2	NhoodGroup 10
EEF1D	NhoodGroup 10
ENO1	NhoodGroup 10
FAU	NhoodGroup 10
FOS	NhoodGroup 10
GADD45B	NhoodGroup 10
GAPDH	NhoodGroup 10
GPX4	NhoodGroup 10
GRINA	NhoodGroup 10
H3-3B	NhoodGroup 10
HLA-A	NhoodGroup 10
HLA-B	NhoodGroup 10
HSPA1A	NhoodGroup 10
HSPA1B	NhoodGroup 10
HSPB1	NhoodGroup 10
IFITM3	NhoodGroup 10
ITPR2	NhoodGroup 10
JUN	NhoodGroup 10
JUNB	NhoodGroup 10
LDHA	NhoodGroup 10
LGALS1	NhoodGroup 10
LGALS3	NhoodGroup 10
MIF	NhoodGroup 10
NDUFA4	NhoodGroup 10
NDUFB9	NhoodGroup 10
NME2	NhoodGroup 10
PKM	NhoodGroup 10
PPP1R15A	NhoodGroup 10
RPL10	NhoodGroup 10
RPL11	NhoodGroup 10
RPL18A	NhoodGroup 10
RPL21	NhoodGroup 10
RPL23A	NhoodGroup 10
RPL30	NhoodGroup 10
RPL36	NhoodGroup 10
RPL41	NhoodGroup 10
RPL7	NhoodGroup 10
RPL8	NhoodGroup 10
RPLP1	NhoodGroup 10
RPS10	NhoodGroup 10
RPS13	NhoodGroup 10
RPS14	NhoodGroup 10
RPS15	NhoodGroup 10
RPS16	NhoodGroup 10
RPS19	NhoodGroup 10
RPS2	NhoodGroup 10
RPS23	NhoodGroup 10
RPS27	NhoodGroup 10
RPS27A	NhoodGroup 10
RPS28	NhoodGroup 10
RPS3	NhoodGroup 10
RPS3A	NhoodGroup 10
RPS4X	NhoodGroup 10
RPS5	NhoodGroup 10
RPS8	NhoodGroup 10
RPS9	NhoodGroup 10
S100A1	NhoodGroup 10
SPON2	NhoodGroup 10
TOMM7	NhoodGroup 10
TPI1	NhoodGroup 10
UBB	NhoodGroup 10
UBC	NhoodGroup 10
UQCRH	NhoodGroup 10
ABLIM1	NhoodGroup 13
ACSS3	NhoodGroup 13
ADD3	NhoodGroup 13
ADGRB3	NhoodGroup 13
AEBP1	NhoodGroup 13
AFF3	NhoodGroup 13
AKAP12	NhoodGroup 13
AKT3	NhoodGroup 13
ALDH1L2	NhoodGroup 13
ANK2	NhoodGroup 13
ANKRD36	NhoodGroup 13
ANKRD36C	NhoodGroup 13
ARHGAP24	NhoodGroup 13
ARL15	NhoodGroup 13
ARRDC3	NhoodGroup 13
ATRNL1	NhoodGroup 13
BABAM2	NhoodGroup 13
BBS9	NhoodGroup 13
BCAS3	NhoodGroup 13
BCL2	NhoodGroup 13
BHLHE41	NhoodGroup 13
BICD1	NhoodGroup 13
BNC2	NhoodGroup 13
BOC	NhoodGroup 13
CA8	NhoodGroup 13
CADPS2	NhoodGroup 13
CAV1	NhoodGroup 13
CDH19	NhoodGroup 13
CFH	NhoodGroup 13
CHL1	NhoodGroup 13
CHST11	NhoodGroup 13
CHST9	NhoodGroup 13
CHSY3	NhoodGroup 13
CLASP1	NhoodGroup 13
CLASP2	NhoodGroup 13
CNTN1	NhoodGroup 13
COL11A1	NhoodGroup 13
COL24A1	NhoodGroup 13
CPEB2	NhoodGroup 13
CPEB3	NhoodGroup 13
CPEB4	NhoodGroup 13
CPED1	NhoodGroup 13
CPQ	NhoodGroup 13
CTNND2	NhoodGroup 13
DCT	NhoodGroup 13
DIP2B	NhoodGroup 13
DIP2C	NhoodGroup 13
DLC1	NhoodGroup 13
DLG2	NhoodGroup 13
DMD	NhoodGroup 13
DMXL2	NhoodGroup 13
DOCK7	NhoodGroup 13
DST	NhoodGroup 13
EDNRB	NhoodGroup 13
EFNA5	NhoodGroup 13
EHBP1	NhoodGroup 13
ENOX1	NhoodGroup 13
ENPP2	NhoodGroup 13
EPS15	NhoodGroup 13
ERBB4	NhoodGroup 13
ERBIN	NhoodGroup 13
ERC1	NhoodGroup 13
EVA1C	NhoodGroup 13
FAF1	NhoodGroup 13
FAM172A	NhoodGroup 13
FARP1	NhoodGroup 13
FBXL7	NhoodGroup 13
FBXO32	NhoodGroup 13
FER	NhoodGroup 13
FKBP5	NhoodGroup 13
FMN1	NhoodGroup 13
FMNL2	NhoodGroup 13
FRY	NhoodGroup 13
FYN	NhoodGroup 13
GAREM1	NhoodGroup 13
GAS2L3	NhoodGroup 13
GLUL	NhoodGroup 13
HHATL	NhoodGroup 13
HIBCH	NhoodGroup 13
HIVEP3	NhoodGroup 13
HPGD	NhoodGroup 13
HSPA12A	NhoodGroup 13
IFI16	NhoodGroup 13
IGSF11	NhoodGroup 13
IMMP2L	NhoodGroup 13
ITPR1	NhoodGroup 13
JAK1	NhoodGroup 13
KCNIP4	NhoodGroup 13
KCNJ13	NhoodGroup 13
KCNT2	NhoodGroup 13
KIAA1109	NhoodGroup 13
LIMA1	NhoodGroup 13
LINGO2	NhoodGroup 13
LONP2	NhoodGroup 13
LONRF1	NhoodGroup 13
LPGAT1	NhoodGroup 13
LRRTM4	NhoodGroup 13
LYST	NhoodGroup 13
LZTS1	NhoodGroup 13
MACF1	NhoodGroup 13
MAGI2	NhoodGroup 13
MBD5	NhoodGroup 13
MBNL1	NhoodGroup 13
MCC	NhoodGroup 13
MEGF10	NhoodGroup 13
MERTK	NhoodGroup 13
MET	NhoodGroup 13
MGP	NhoodGroup 13
MICAL3	NhoodGroup 13
MPDZ	NhoodGroup 13
MPPED2	NhoodGroup 13
MT-ND6	NhoodGroup 13
MT2A	NhoodGroup 13
MTUS1	NhoodGroup 13
MYCBP2	NhoodGroup 13
MYO1D	NhoodGroup 13
NAALADL2	NhoodGroup 13
NAV1	NhoodGroup 13
NAV3	NhoodGroup 13
NCOA1	NhoodGroup 13
NFIA	NhoodGroup 13
NIBAN1	NhoodGroup 13
NIN	NhoodGroup 13
NKTR	NhoodGroup 13
NLGN1	NhoodGroup 13
NPAS3	NhoodGroup 13
NR3C1	NhoodGroup 13
NR3C2	NhoodGroup 13
NRG3	NhoodGroup 13
NT5C2	NhoodGroup 13
NTNG1	NhoodGroup 13
PARD3B	NhoodGroup 13
PCDH7	NhoodGroup 13
PCGF5	NhoodGroup 13
PDE3B	NhoodGroup 13
PDE4D	NhoodGroup 13
PDGFD	NhoodGroup 13
PHLPP1	NhoodGroup 13
PIR	NhoodGroup 13
PKNOX2	NhoodGroup 13
PLCB4	NhoodGroup 13
PLEKHH1	NhoodGroup 13
PLXNC1	NhoodGroup 13
PPARGC1A	NhoodGroup 13
PPP1R9A	NhoodGroup 13
PRKD1	NhoodGroup 13
PRKD3	NhoodGroup 13
PRKN	NhoodGroup 13
PROS1	NhoodGroup 13
PSD3	NhoodGroup 13
PTEN	NhoodGroup 13
PTPN13	NhoodGroup 13
PTPRM	NhoodGroup 13
RABGAP1L	NhoodGroup 13
RBMS3	NhoodGroup 13
RHOJ	NhoodGroup 13
RNF150	NhoodGroup 13
S100B	NhoodGroup 13
SAMHD1	NhoodGroup 13
SBF2	NhoodGroup 13
SEMA5A	NhoodGroup 13
SEMA6D	NhoodGroup 13
SERPINE2	NhoodGroup 13
SERPING1	NhoodGroup 13
SHC4	NhoodGroup 13
SLC39A11	NhoodGroup 13
SMYD3	NhoodGroup 13
SNCA	NhoodGroup 13
SOX5	NhoodGroup 13
SPP1	NhoodGroup 13
SPTBN1	NhoodGroup 13
ST3GAL6	NhoodGroup 13
ST6GALNAC3	NhoodGroup 13
ST8SIA6	NhoodGroup 13
STK24	NhoodGroup 13
STK32A	NhoodGroup 13
STXBP1	NhoodGroup 13
STXBP5	NhoodGroup 13
TACC1	NhoodGroup 13
TDRD3	NhoodGroup 13
TENM2	NhoodGroup 13
TMTC1	NhoodGroup 13
TNS1	NhoodGroup 13
TRIM2	NhoodGroup 13
TRIM63	NhoodGroup 13
TRMT9B	NhoodGroup 13
TRPM1	NhoodGroup 13
TRPS1	NhoodGroup 13
TYR	NhoodGroup 13
UACA	NhoodGroup 13
USP9Y	NhoodGroup 13
UTRN	NhoodGroup 13
UTY	NhoodGroup 13
VPS13C	NhoodGroup 13
WDPCP	NhoodGroup 13
XYLT1	NhoodGroup 13
YJEFN3	NhoodGroup 13
ZBTB16	NhoodGroup 13
ZBTB20	NhoodGroup 13
ZEB2	NhoodGroup 13
ZFHX3	NhoodGroup 13
ZFYVE16	NhoodGroup 13
ZNF804B	NhoodGroup 13
ZSWIM6	NhoodGroup 13
AFF3	NhoodGroup 14
ANKRD30B	NhoodGroup 14
APBB2	NhoodGroup 14
ARHGAP24	NhoodGroup 14
BCL2	NhoodGroup 14
BNC2	NhoodGroup 14
BTBD9	NhoodGroup 14
CDH19	NhoodGroup 14
CHSY3	NhoodGroup 14
CNTN4	NhoodGroup 14
CPEB2	NhoodGroup 14
DIP2C	NhoodGroup 14
DLC1	NhoodGroup 14
EDNRB	NhoodGroup 14
EXOC6B	NhoodGroup 14
FARP1	NhoodGroup 14
FMN1	NhoodGroup 14
FNBP1	NhoodGroup 14
GAB1	NhoodGroup 14
HIPK2	NhoodGroup 14
IGFBP7	NhoodGroup 14
INPP4B	NhoodGroup 14
KCNQ5	NhoodGroup 14
KIT	NhoodGroup 14
L3MBTL4	NhoodGroup 14
LIMA1	NhoodGroup 14
LONRF1	NhoodGroup 14
LRMDA	NhoodGroup 14
MACROD2	NhoodGroup 14
MAML3	NhoodGroup 14
MAPK4	NhoodGroup 14
MDGA2	NhoodGroup 14
MT-ND6	NhoodGroup 14
MT-RNR1	NhoodGroup 14
MT-RNR2	NhoodGroup 14
MTHFD1L	NhoodGroup 14
MYO5A	NhoodGroup 14
NAV3	NhoodGroup 14
NRG3	NhoodGroup 14
OCA2	NhoodGroup 14
PAG1	NhoodGroup 14
PCDH7	NhoodGroup 14
PDE10A	NhoodGroup 14
PDE4D	NhoodGroup 14
PIP4K2A	NhoodGroup 14
PKD2	NhoodGroup 14
PLCB4	NhoodGroup 14
PRUNE2	NhoodGroup 14
PTPRM	NhoodGroup 14
PYGL	NhoodGroup 14
RAPGEF1	NhoodGroup 14
RHOBTB3	NhoodGroup 14
SAMHD1	NhoodGroup 14
SGCD	NhoodGroup 14
SNED1	NhoodGroup 14
SOX5	NhoodGroup 14
SPTBN1	NhoodGroup 14
STK32A	NhoodGroup 14
STXBP1	NhoodGroup 14
STXBP6	NhoodGroup 14
SYNE2	NhoodGroup 14
TMEM117	NhoodGroup 14
TMTC1	NhoodGroup 14
TYRP1	NhoodGroup 14
UTRN	NhoodGroup 14
ZBTB16	NhoodGroup 14
ZEB2	NhoodGroup 14
